# Supplementary material for: Toward a Better Understanding of Bioassays for the Development of Biopharmaceuticals by Exploring the Structure-Antibody-Dependent Cellular Cytotoxicity Relationship in Human Primary Cells
Source: Front Immunol. 2020 Oct 29;11:552596. doi: 10.3389/fimmu.2020.552596 (PMC7658677; doi:10.3389/fimmu.2020.552596)
Supplement: Supplementary file 2 [file Table_1.xlsx]

## Sheet: allotypes_pbmcs
# genotyping results for each donor tested and its corresponding FCGR3A haplotype
donor,allotype,FCGR3A
015,A	A,F/F
016,A	A,F/F
017,A	A,F/F
018,A	C,F/V
019,C	C,V/V
020,A	A,F/F
021,A	A,F/F
022,A	C,F/V
023,A	A,F/F
024,A	C,F/V
025,A	C,F/V
026,A	A,F/F
027,A	A,F/F
028,A	A,F/F
029,A	C,F/V
030,A	C,F/V
031,A	C,F/V
032,C	C,V/V
033,A	C,F/V
034,A	A,F/F
035,A	C,F/V
036,A	C,F/V
037,A	C,F/V
038,C	C,V/V
039,A	A,F/F
040,A	A,F/F
041,A	C,F/V
042,A	C,F/V
043,A	A,F/F
044,A	C,F/V

## Sheet: data_all_fc021
# raw data obtained from the flow cytometry experiments fc021 using the 3 antibody panels and the PBMCs from 19 donors. Donor Id are in index. Each column contains the frequency of the indicated subset among the indicated population for each donor (row)
donor,nk,mfi_cd56,cd56+lin+,cd56hicd16-,cd56intcd16hi,cd56locd16-,nk_cd16b+,nk_cd32+,nk_cd64+,nk_fcrl3+,nk_fcrl5+,nk_fcrl6+,lin+cd16+,lin+cd16b+,lin+cd32+,lin+cd64+,lin+fcrl3+,lin+fcrl5+,lin+fcrl6+,pd1+nk,cd57+nk,nkp30+nk,nkp44+nk,nkp46+nk,nkg2a+nk,nkg2c+nk,nkg2d+nk,kir2dl1+nk,kir2dl2+nk,kir3dl1+nk,pd1+nkt,cd57+nkt,nkp30+nkt,nkp44+nkt,nkp46+nkt,nkg2a+nkt,nkg2c+nkt,nkg2d+nkt,kir2dl1+nkt,kir2dl2+nk…
015,9.33,5339,10.0,4.08,80.7,11.7,2.87,1.66,1.16,3.22,0.81,38.5,18.8,13.1,19.6,15.3,11.5,12.8,21.2,2.89,37.9,77.2,42.1,81.0,40.6,3.62,58.2,14.6,39.1,0.0,30.0,45.0,20.7,17.1,18.4,22.0,14.5,53.8,11.9,28.1,0.0,59.7,3.88,2.5,20.4,13.0,33.2,36.9,26.8,32.1,15.8,1.56,4.61,34.2,51.9,9.35,34.8,1.75,41.5,21.9,0.35,4.16,42.1,3.57,44.4,76.1,6.03,0.24,10.7,19.33
017,8.66,4931,5.17,5.26,79.2,12.6,9.93,1.6,0.64,2.37,0.78,2.59,12.3,18.7,17.6,12.3,9.8,8.86,11.4,0.87,11.9,74.5,39.1,89.6,54.2,3.14,55.4,19.6,20.8,9.19,22.1,12.2,3.91,3.12,6.35,20.3,4.27,35.7,4.27,14.8,1.22,62.4,3.99,2.98,15.2,14.5,61.0,25.9,14.0,21.7,11.0,2.38,9.15,18.4,42.9,29.5,46.4,1.77,22.8,28.9,0.25,3.89,65.6,3.42,17.8,50.7,5.46,0.44,19.1,13.83
018,7.95,8503,2.15,7.55,75.5,13.8,1.97,1.49,0.57,12.0,0.63,10.4,19.5,17.5,26.2,22.0,20.1,15.7,20.6,0.61,15.9,92.2,44.3,89.9,47.5,6.44,64.9,24.2,33.7,13.6,24.8,4.91,10.8,7.19,12.4,4.5,2.21,38.6,12.8,34.0,1.18,55.5,6.08,2.38,24.0,11.3,70.6,21.6,4.97,15.7,7.73,0.15,14.6,10.4,35.8,39.3,55.5,0.74,27.7,16.1,0.17,4.9,82.0,1.08,8.75,78.4,2.84,0.31,6.81,10.1
019,11.6,2471,2.78,1.31,84.0,13.1,1.29,0.99,0.75,16.4,0.84,50.7,20.3,15.5,26.6,21.7,23.0,16.8,24.9,0.064,20.1,67.7,34.9,74.5,65.3,6.77,65.1,12.2,18.6,37.2,6.86,63.0,20.8,14.2,21.6,2.45,14.2,44.4,58.8,18.6,1.47,50.0,5.57,3.26,25.0,15.5,43.6,46.6,12.2,31.7,15.3,3.74,21.0,20.0,53.4,5.67,48.7,0.32,47.2,3.73,0.28,4.76,74.1,2.52,12.9,79.8,2.77,0.47,7.73,14.38
020,7.94,6785,8.76,6.02,75.4,15.5,1.57,2.91,1.26,6.66,0.92,35.5,21.4,17.0,24.9,15.8,18.2,13.6,18.7,0.57,51.1,74.2,44.5,74.3,52.6,23.8,63.7,24.6,25.5,7.44,8.28,68.6,34.3,21.1,29.7,9.66,16.8,45.1,18.6,57.6,2.72,58.6,10.6,2.56,17.6,9.87,59.3,29.8,7.59,29.3,14.9,2.26,12.8,26.9,33.1,27.2,48.8,0.7,38.3,12.2,0.47,4.91,63.6,6.3,23.2,60.0,1.72,0.26,9.16,16.7
021,3.71,8704,9.2,12.1,71.0,13.9,4.42,3.21,1.58,3.21,1.08,39.4,11.1,17.0,15.4,10.8,8.27,8.13,12.4,1.24,28.8,73.7,41.0,82.5,45.6,6.25,56.6,24.9,22.5,27.8,35.8,17.4,4.62,3.13,8.45,6.85,2.1,55.5,4.21,18.4,8.21,74.3,5.14,1.77,13.3,4.88,54.8,31.2,11.6,31.4,18.5,2.25,14.2,14.3,66.9,4.6,36.6,0.96,51.5,10.9,0.22,4.3,52.3,7.95,29.9,75.5,4.51,0.18,5.34,12.91
022,4.43,11357,8.66,16.6,61.2,18.8,1.17,5.24,1.94,16.5,1.17,33.6,29.1,13.4,24.4,16.2,31.9,15.4,32.4,0.65,8.9,69.7,45.0,78.0,60.2,5.7,63.0,0.65,30.0,29.3,31.8,46.7,9.31,7.42,16.4,12.7,2.05,58.0,2.66,46.2,11.4,62.6,8.06,1.33,18.8,8.34,39.9,52.9,6.27,43.8,26.0,2.03,5.79,56.7,27.6,9.89,40.0,1.16,44.5,14.4,0.27,4.31,61.7,7.37,24.4,47.2,5.05,0.12,14.6,13.09
023,8.37,9866,13.4,6.87,75.2,15.2,1.41,2.03,1.08,10.1,0.78,19.8,18.3,6.93,14.0,10.0,14.8,8.44,11.3,1.97,25.1,85.8,43.1,84.2,76.7,3.14,74.4,7.21,20.6,12.8,31.8,52.6,12.9,9.73,16.4,48.5,1.64,67.5,3.97,15.5,8.65,70.1,5.49,2.08,10.8,11.1,55.8,18.5,28.7,28.9,13.6,7.89,9.78,42.1,38.4,9.73,61.6,1.49,24.3,12.6,0.37,3.14,31.0,20.2,40.5,51.4,4.15,0.19,14.3,21.77
024,16.3,6432,10.9,2.52,86.7,7.66,0.7,0.82,0.53,14.1,0.83,35.3,30.1,12.5,20.3,15.6,20.2,13.5,39.3,1.32,23.6,68.0,44.5,85.4,39.1,0.14,88.7,19.4,15.5,0.00705,14.7,68.7,27.4,19.5,26.5,4.95,0.065,77.4,8.72,40.9,0.0,54.9,6.27,1.58,17.7,19.0,35.6,54.6,6.97,46.0,24.0,2.21,6.62,27.6,57.3,8.5,44.8,1.03,35.9,18.2,0.49,5.15,29.2,7.48,56.4,49.1,11.5,0.35,5.61,27.200000000000006
025,7.19,7611,13.2,3.74,78.4,13.8,1.39,2.45,0.42,17.1,0.6,38.3,18.2,12.6,21.3,14.8,25.7,12.2,26.2,4.44,60.2,85.4,47.2,82.2,35.3,3.01,50.2,8.29,37.5,41.3,52.5,65.6,21.4,15.9,22.1,1.9,10.5,68.9,1.96,18.9,5.96,65.1,7.34,2.01,16.5,8.48,56.8,38.0,4.33,34.7,21.2,1.68,11.5,23.8,55.9,8.79,57.4,0.66,34.5,7.44,0.41,3.9,24.5,8.73,57.5,71.2,2.37,0.1,2.59,20.39
026,11.5,8286,3.12,9.0,75.9,11.0,0.89,2.12,0.62,15.9,0.62,38.6,10.4,8.64,18.7,10.8,14.6,8.5,13.6,4.59,35.3,82.3,45.2,76.4,37.1,30.7,79.7,21.1,27.7,41.7,50.7,57.4,27.5,18.9,25.6,5.25,3.57,66.9,5.76,32.1,3.92,55.9,7.05,2.28,10.2,23.9,71.1,24.9,2.39,19.2,10.1,0.27,14.1,12.9,33.1,39.9,31.7,0.54,60.8,7.0,0.18,3.08,47.2,5.26,37.7,37.9,1.01,0.15,36.1,14.62
027,5.89,7684,7.99,9.62,76.3,11.3,1.21,3.02,0.56,17.9,0.76,23.8,13.7,9.84,22.8,13.3,20.5,9.91,21.1,1.08,27.3,76.3,40.6,84.3,59.2,20.5,79.3,20.7,12.3,0.15,25.3,38.0,11.2,7.51,16.0,7.92,13.7,61.7,8.88,19.9,0.0,68.4,5.37,2.02,15.2,8.38,60.6,27.4,8.05,26.8,14.1,2.01,18.3,11.4,62.8,7.53,42.3,0.6,55.4,1.71,0.4,2.2,28.3,8.04,53.0,57.1,4.43,0.21,10.2,13.88
028,7.47,7197,4.22,5.76,75.2,14.7,1.17,0.8,0.65,28.6,1.35,27.4,8.84,5.73,10.3,7.11,13.9,5.69,8.07,4.49,40.3,71.5,42.6,80.4,52.4,12.7,70.4,24.1,24.2,9.59,25.8,28.6,16.3,11.0,17.6,19.6,2.74,51.1,4.7,24.5,1.74,77.0,3.63,1.3,8.11,9.37,54.1,29.5,14.0,25.8,17.3,2.38,2.2,60.9,2.05,34.8,16.2,26.3,14.1,43.5,0.36,4.71,64.2,5.26,17.6,49.5,3.22,0.38,6.27,11.69
029,7.21,6143,11.7,8.76,75.9,11.2,1.55,3.61,0.94,3.08,0.82,33.1,18.1,9.76,19.1,13.1,12.5,10.3,25.5,0.36,18.9,75.2,35.3,84.3,35.0,4.91,53.3,16.7,42.4,0.017,22.7,34.7,10.3,6.52,14.9,11.7,13.1,49.3,17.6,18.7,0.00945,65.8,5.02,2.87,16.0,9.86,60.4,31.9,7.18,28.9,17.1,2.2,5.96,34.7,55.1,4.28,57.1,0.82,35.2,6.84,0.26,3.76,34.1,7.29,48.2,73.7,2.9,0.61,8.09,18.91
030,15.8,4532,10.0,1.25,76.5,19.2,1.31,9.67,0.77,10.7,1.3,57.2,22.7,11.7,27.2,15.9,19.6,12.8,33.6,5.43,52.7,77.0,43.6,73.1,15.0,27.2,52.9,13.7,38.2,11.0,36.0,62.3,27.9,19.1,29.6,2.68,3.62,50.6,4.43,25.0,1.17,54.8,5.66,2.7,15.9,20.4,53.2,35.4,11.5,31.7,14.7,3.65,4.56,58.6,29.9,7.0,45.6,4.26,36.3,13.8,0.47,3.05,39.2,9.26,42.2,57.2,4.55,0.19,11.1,25.8
031,4.63,2737,5.17,4.4,77.4,14.9,1.23,3.21,1.05,33.1,1.09,45.1,14.7,7.58,19.9,12.2,22.1,9.16,18.0,2.68,50.6,82.7,41.1,84.9,39.7,4.75,56.3,31.3,18.3,9.32,43.7,44.7,15.1,10.0,19.0,20.5,0.54,59.4,4.25,19.2,0.75,69.7,6.67,2.19,13.5,7.31,72.6,19.1,7.3,16.8,10.0,2.5,20.2,28.0,45.3,6.49,70.8,0.53,24.1,4.54,0.16,3.99,50.6,2.64,34.3,64.3,3.14,0.35,13.4,9.8
032,7.78,7333,34.4,3.96,73.5,19.4,1.56,3.92,2.6,21.0,1.89,55.1,23.1,10.9,23.6,16.6,23.0,12.3,22.8,1.07,12.6,75.8,39.7,77.7,52.1,2.32,50.6,14.4,44.1,5.54,4.43,17.7,6.43,4.35,7.13,27.9,1.48,55.6,1.35,8.91,0.58,59.6,8.67,3.95,17.5,9.62,42.1,54.2,1.63,51.7,28.9,0.54,4.6,15.3,78.9,1.17,60.6,0.36,37.5,1.61,0.55,5.36,65.2,7.12,16.6,66.2,3.36,0.23,6.47,42.18
033,7.54,6718,4.45,4.19,79.0,14.3,0.38,2.11,0.84,25.9,0.52,52.9,10.4,3.56,12.1,6.74,10.4,5.13,12.2,0.93,18.9,77.8,39.7,81.2,71.8,9.07,76.2,20.1,28.8,10.0,26.5,48.1,14.7,10.0,20.4,19.7,24.0,55.3,4.67,33.1,15.6,74.8,7.06,1.81,6.41,9.23,68.6,25.0,3.16,20.8,14.2,0.82,12.7,30.1,32.5,24.7,54.6,0.49,32.5,12.4,0.28,5.19,51.5,6.94,26.8,58.5,5.08,0.32,7.2,11.99
034,10.5,7077,9.32,3.02,76.9,17.9,0.57,1.35,0.43,17.4,0.5,54.4,12.9,5.64,17.8,11.0,21.2,8.26,18.1,3.36,49.8,73.4,36.8,75.4,29.4,20.0,67.5,19.1,38.5,14.0,19.0,37.7,11.8,7.66,13.7,15.0,17.9,55.3,11.5,27.5,1.04,64.4,9.6,1.8,11.1,12.5,50.3,40.9,6.9,35.5,19.9,1.16,7.39,32.8,40.2,19.6,36.3,1.22,38.6,23.8,0.21,5.12,44.3,6.9,34.6,71.3,1.06,0.34,5.72,19.82

## Sheet: data_all_fc022
# raw data obtained from the flow cytometry experiments fc022 using the 3 antibody panels and the PBMCs from 30 donors. Donor Id are in index. Each column contains the frequency of the indicated subset among the indicated population for each donor (row)
donor,nkt_a,nk_a,tcrgd_a,tcrdg_cd56+,nk_cd56hi|cd16-,nk_cd56int|cd16hi,nk_cd56lo|cd16-,nk_cd16b+,nk_cd32+,nk_cd64+,nk_fcrl3+,nk_fcrl5+,nk_fcrl6+,nkt_cd16+,nkt_cd16b+,nkt_cd32+,nkt_cd64+,nkt_fcrl3+,nkt_fcrl5+,nkt_fcrl6+,tcrgd_cd16+,tcrgd_cd16b+,tcrgd_cd32+,tcrgd_cd64+,tcrgd_fcrl3+,tcrgd_fcrl5+,tcrgd_fcrl6+,live,nkt|live,nk|live,cd56dim_cd16-|nk,cd56hi_cd16-|nk,cd56int_cd16+|nk,cd57+|nk,pd1+|nk,nkp…
015,6.72,7.34,11.8,13.9,4.11,80.4,14.9,0.76,9.57,2.38,17.6,2.43,46.7,40.7,13.1,9.04,7.57,15.2,6.8,65.3,11.3,3.39,1.14,0.87,3.03,0.67,9.61,79.1,10.1,7.47,12.0,3.57,84.4,38.4,1.38,29.7,5.95,80.4,36.9,3.36,71.9,15.6,39.1,0.055999999999999994,25.6,57.4,15.8,6.14,4.58,6.82,20.7,16.7,75.9,10.5,18.1,0.027000000000000003,78.0,53.0,5.07,41.8,11.0,64.2,24.3,92.0,5.29,3.04,87.1,4.81,1.03,22.6,75.5,4.64,86.7…
016,2.92,8.14,0.7,12.7,2.94,71.7,24.6,0.84,13.5,1.09,21.9,3.2,44.2,61.6,60.9,68.6,57.1,61.8,56.9,65.8,19.6,11.8,12.7,5.88,14.7,6.86,17.6,57.5,5.91,10.2,40.0,3.32,56.7,16.1,0.42,36.0,8.02,59.6,32.8,8.78,55.7,16.0,17.5,0.076,56.5,7.0,15.9,7.07,1.78,34.4,0.79,2.18,71.7,0.46,0.66,0.0,58.7,41.0,8.18,50.6,13.3,57.3,28.9,94.4,1.22,2.39,82.8,8.52,0.41,40.6,58.8,5.09,68.7,26.1,70.3,25.6,3.59,3.88,1.52,59.…
017,4.59,7.16,6.39,25.1,5.21,67.9,26.1,2.71,7.01,1.93,15.0,2.56,14.8,44.1,38.1,28.3,22.2,28.0,18.1,26.3,25.1,13.4,3.4,1.48,4.65,1.35,5.36,67.5,7.25,8.59,24.5,4.48,70.7,12.6,0.88,30.7,9.03,76.2,50.3,2.38,69.7,16.7,22.9,9.99,40.2,11.8,16.1,6.07,2.14,15.5,14.7,4.42,62.8,0.7,2.05,1.4,66.9,63.0,6.61,30.1,22.2,43.6,33.4,88.7,7.59,4.87,76.1,8.72,0.75,28.1,70.2,6.49,77.3,16.1,65.1,25.2,9.13,7.83,10.7,54.…
018,1.24,6.57,1.85,8.52,7.11,75.8,16.5,0.69,4.23,1.53,21.8,1.9,11.3,57.6,54.9,59.7,55.4,61.8,47.1,61.6,4.09,3.2,2.07,1.23,24.1,1.82,5.71,83.8,2.0,6.84,17.9,6.95,75.0,18.2,1.1,58.8,9.51,84.2,39.3,6.29,76.7,23.9,34.4,14.4,45.9,4.23,14.5,9.18,3.22,19.2,4.05,3.93,58.3,1.7,1.85,1.4,83.2,45.0,7.77,47.0,8.77,74.4,16.4,92.1,3.98,16.1,77.6,1.37,0.79,17.7,81.1,8.67,78.8,12.1,68.6,25.0,5.28,3.59,4.35,63.8,3…
019,3.48,10.1,6.39,26.5,1.08,86.1,12.5,0.33,7.52,2.02,30.6,2.99,44.6,82.1,38.7,42.8,29.9,72.1,27.3,89.3,36.9,2.53,2.76,1.27,50.5,2.28,72.1,73.4,5.58,11.5,13.6,0.97,85.3,25.1,0.52,33.7,5.05,83.2,63.9,6.47,77.5,12.7,21.6,38.9,30.8,53.6,6.91,7.26,2.68,12.3,2.47,9.62,76.1,48.2,0.89,1.28,73.7,44.4,6.83,48.5,10.7,61.8,27.0,94.0,3.13,9.32,78.2,4.38,1.07,30.1,68.3,1.57,89.9,8.31,37.7,52.4,5.76,6.81,13.2,…
020,8.67,7.15,4.38,42.9,4.45,80.3,15.0,1.74,11.1,3.79,21.9,2.51,34.6,71.2,24.9,22.8,16.0,29.4,14.2,57.7,46.2,6.07,5.67,2.52,12.7,1.95,14.7,71.0,13.9,7.57,12.9,5.71,81.0,56.4,1.29,23.6,5.54,60.3,51.2,23.6,83.3,5.93,27.7,8.95,39.0,64.6,11.0,6.44,3.43,12.2,6.08,13.7,75.1,0.52,21.7,2.5,73.2,54.1,12.3,33.3,11.5,63.2,24.7,88.2,1.78,12.8,73.4,8.98,0.91,19.3,79.1,6.83,83.4,9.35,57.2,31.9,9.4,14.2,7.48,72…
021,8.87,3.57,8.1,65.4,10.6,68.4,20.8,3.59,11.5,2.96,13.8,3.33,38.4,45.8,33.7,19.8,14.4,20.6,12.1,35.8,28.8,15.5,3.94,2.02,3.55,1.58,16.4,68.6,11.0,4.04,22.5,8.72,68.2,35.4,0.88,23.3,5.44,75.6,38.4,5.5,64.6,24.5,25.6,31.8,35.0,19.7,29.4,3.11,1.38,16.4,6.57,2.78,70.0,2.27,5.3,8.18,70.2,67.9,8.15,23.7,16.8,63.4,19.3,94.5,2.61,3.48,80.6,11.1,0.73,19.2,79.6,11.4,75.5,12.8,49.4,35.9,12.5,14.2,13.0,52.…
022,6.45,3.53,3.03,38.0,19.7,59.9,19.9,0.45,6.55,1.65,23.3,1.24,26.0,63.7,16.3,17.8,12.0,52.9,10.9,68.1,45.0,3.65,3.17,1.87,23.6,1.49,21.4,72.8,10.2,3.74,20.6,16.7,62.5,9.85,1.56,23.1,6.96,79.0,62.5,5.37,70.0,0.026000000000000002,32.7,33.0,45.9,45.1,25.2,3.64,2.12,12.1,11.8,2.99,70.6,0.3,25.8,11.0,72.1,61.3,11.2,27.2,10.5,71.3,17.8,90.6,4.19,3.29,84.1,8.76,0.6,26.6,72.0,23.5,65.3,10.4,46.7,47.0,4…
023,15.0,7.36,16.5,60.5,6.61,78.8,13.9,0.15,4.86,2.36,19.0,2.16,26.1,57.2,12.2,12.1,11.5,38.4,9.5,33.6,43.4,0.64,0.55,1.11,17.3,0.44,18.1,85.9,18.4,7.43,11.8,6.57,81.4,26.5,1.43,41.2,8.41,84.6,75.8,2.59,87.6,6.91,23.2,13.2,42.6,47.7,20.2,4.06,2.31,8.76,43.2,1.62,80.7,1.05,1.86,8.06,86.1,66.6,5.42,27.8,10.2,59.7,29.9,88.8,5.71,3.13,73.8,16.9,0.4,11.8,87.3,7.64,85.7,6.52,57.7,21.3,20.6,18.7,25.3,53…
024,8.69,14.8,3.95,26.8,2.78,76.1,20.5,0.26,5.88,2.24,25.7,1.86,44.3,68.7,7.4,6.83,5.95,24.7,6.01,88.5,52.4,2.39,1.52,1.31,22.1,1.37,45.5,80.5,14.7,16.7,16.7,2.82,80.3,23.4,0.55,17.6,5.01,77.5,36.3,0.16,93.5,16.1,15.3,0.021,36.8,68.0,5.74,4.17,3.9,7.72,4.27,0.6,85.2,4.18,25.9,0.027999999999999997,81.4,52.4,9.54,37.8,9.63,44.3,45.9,83.0,7.19,2.39,82.1,10.5,0.74,17.7,80.8,3.92,83.3,12.4,34.8,56.2,7…
025,12.4,6.41,2.74,57.2,3.42,82.6,13.4,1.02,10.3,2.14,33.5,2.14,41.7,36.5,8.44,6.84,5.54,45.0,5.37,89.5,45.8,2.49,3.99,1.56,43.7,1.31,50.1,77.5,15.1,7.42,12.3,3.92,83.7,66.0,1.69,34.2,6.71,73.7,32.6,2.94,72.0,6.56,39.6,42.3,20.2,70.4,39.9,4.42,3.7,8.73,1.87,10.8,84.4,0.35,8.89,5.6,80.9,57.9,9.88,31.9,9.59,67.2,22.8,95.3,1.67,2.18,82.4,9.61,0.61,10.3,88.3,4.1,87.6,8.03,53.7,41.8,2.55,17.8,4.31,80.…
026,2.98,9.72,1.39,26.5,8.36,80.1,11.0,0.34,7.75,2.3,27.6,2.44,40.0,31.2,10.9,10.9,8.79,32.5,7.55,82.2,20.3,2.5,4.28,2.24,19.8,1.71,22.0,79.9,3.87,11.1,10.2,6.81,82.9,37.6,1.11,42.2,5.14,69.2,31.8,32.4,88.3,19.6,29.0,44.0,17.6,60.8,46.1,5.59,3.72,8.63,5.19,3.88,83.6,1.09,17.3,3.85,76.9,57.4,9.18,33.2,6.75,47.3,45.3,90.2,2.38,4.86,84.8,4.91,0.36,28.2,71.0,9.8,82.6,7.29,69.3,27.0,2.51,5.38,2.45,75.…
027,6.84,4.97,4.92,29.8,8.93,72.5,18.0,0.28,7.13,2.12,28.6,2.24,27.5,34.1,7.47,6.47,4.95,33.7,4.49,56.3,35.3,3.18,3.8,1.65,40.3,2.14,46.0,77.8,9.23,5.73,17.4,8.34,73.9,28.9,1.07,23.8,5.81,80.2,53.4,20.4,90.4,20.5,12.5,0.049,23.2,46.2,22.6,4.32,2.53,8.49,5.69,15.4,71.1,5.44,10.3,0.061,77.1,62.9,7.22,29.5,12.4,64.2,23.0,92.2,2.63,2.01,82.0,9.8,0.96,26.5,72.1,11.4,75.7,12.6,59.2,29.9,7.8,11.0,7.97,5…
028,3.92,6.88,10.2,14.1,5.01,81.2,13.2,0.26,6.48,2.78,41.3,4.05,24.5,45.8,22.1,27.4,25.7,45.5,16.6,51.5,24.8,0.97,1.33,0.96,36.0,0.94,9.76,81.6,5.28,8.19,12.2,4.25,83.3,44.9,1.08,19.9,4.03,74.1,49.6,13.0,83.6,21.7,25.7,9.67,26.6,37.6,16.6,4.08,2.05,9.32,17.5,3.44,70.3,1.43,6.01,1.61,82.8,70.9,5.34,23.5,9.31,53.2,37.0,83.6,5.64,6.03,79.9,6.9,0.74,18.2,80.2,6.21,86.8,6.63,49.6,34.2,14.1,8.28,14.9,6…
029,9.51,6.56,4.21,38.6,7.51,77.7,14.3,0.26,7.21,1.46,11.9,2.53,35.7,61.6,16.6,15.7,10.7,21.4,11.2,74.7,35.4,3.41,3.21,2.88,6.43,2.14,62.0,73.1,12.9,6.67,15.6,8.98,75.2,22.6,0.62,28.8,4.03,81.3,32.2,4.32,67.7,13.8,40.8,0.021,45.1,36.7,15.9,5.38,2.03,17.5,7.32,12.9,75.5,13.8,6.78,0.053,72.1,55.6,6.91,37.3,11.2,67.9,20.6,93.9,2.09,2.73,82.7,9.33,1.1,21.1,76.1,10.0,80.5,9.14,56.6,35.2,6.94,13.3,7.42…
030,11.6,13.8,6.35,44.3,1.4,90.3,8.04,0.28,7.92,1.95,21.0,2.34,61.4,67.6,13.5,15.9,14.2,35.3,10.3,83.9,57.6,1.19,4.41,2.05,20.4,0.99,66.9,83.4,15.0,15.1,7.94,2.0,90.0,56.0,0.72,23.5,3.55,66.2,13.7,30.3,69.8,13.5,41.2,11.6,54.3,64.8,19.6,4.28,2.65,9.28,2.01,4.66,79.3,1.96,11.6,0.89,84.4,52.8,6.61,40.4,7.8,50.7,40.9,87.3,3.83,2.6,76.8,11.9,0.52,15.3,83.5,1.45,93.5,5.0,51.7,38.1,6.86,14.3,12.0,70.9,…
031,7.07,4.2,4.88,44.0,4.78,80.0,14.9,0.052000000000000005,4.37,2.03,34.0,2.65,39.6,61.3,21.3,24.6,22.2,66.5,14.8,65.0,49.1,0.81,1.03,0.98,44.0,0.63,37.3,85.3,9.78,4.62,18.7,4.55,76.6,51.2,1.24,34.3,8.03,77.7,35.4,4.16,79.4,27.9,17.2,7.95,43.5,43.4,27.4,3.48,2.38,11.3,17.2,1.89,76.2,1.43,1.77,0.64,85.1,62.1,8.13,29.6,9.22,69.9,20.2,83.7,5.46,7.23,79.3,4.64,1.12,43.1,55.0,8.25,78.4,13.0,66.5,24.8,…
032,31.2,6.09,1.01,66.0,4.04,79.0,16.7,0.75,8.73,3.96,35.1,3.89,49.2,42.4,5.22,6.17,5.31,26.2,4.97,24.4,52.5,3.78,1.89,2.18,23.1,2.62,39.7,83.4,32.3,6.47,16.1,3.29,80.4,14.8,1.25,33.8,6.12,82.5,51.2,3.08,57.4,13.4,47.1,6.24,15.3,20.2,1.89,1.6,1.23,5.91,26.8,1.59,63.6,0.56,4.1,0.53,82.3,55.3,9.82,34.7,13.4,64.7,21.5,89.2,4.56,11.6,69.2,9.9,0.56,15.7,83.4,3.75,88.6,7.25,38.0,59.0,1.98,44.7,1.65,75.…
033,4.3,7.5,2.22,18.0,4.03,80.5,15.1,0.42,8.36,2.98,41.9,3.58,49.4,70.1,12.2,14.5,12.2,44.1,8.79,77.0,28.9,2.08,1.68,2.04,23.2,1.77,34.7,80.4,5.54,8.45,15.7,3.44,80.5,20.0,0.9,35.8,5.48,80.9,69.0,8.18,85.0,18.4,28.7,9.1,48.9,58.1,21.9,4.32,3.06,9.25,18.1,29.7,71.6,1.71,22.7,17.5,80.9,66.4,11.5,21.8,15.2,44.7,39.4,89.5,5.94,5.04,73.8,7.88,0.41,11.1,87.8,3.73,87.5,8.56,63.8,30.4,3.72,6.7,3.37,80.3,…
034,9.21,8.64,4.24,44.5,3.03,85.4,11.4,0.96,6.92,2.29,31.4,1.9,54.9,39.5,10.1,10.2,8.88,43.0,7.55,61.0,31.3,1.87,2.01,0.98,32.7,1.27,36.2,85.8,10.6,9.82,11.5,3.13,85.2,51.8,0.82,24.2,4.54,74.2,26.1,20.3,79.7,17.6,38.8,14.2,25.9,47.2,14.9,3.7,1.91,10.7,12.9,21.3,70.6,10.8,22.6,0.95,85.7,59.1,11.3,29.2,8.73,53.6,36.6,91.0,2.31,5.54,77.1,8.4,0.63,10.7,88.4,3.48,89.3,6.97,44.3,47.9,6.7,13.7,7.11,67.3…
035,4.26,11.5,2.32,21.9,5.63,76.6,17.5,0.71,9.67,3.09,32.4,3.27,30.2,35.1,27.7,33.0,30.7,38.3,26.4,40.4,13.6,3.86,3.11,2.17,32.9,2.17,7.69,77.7,6.72,13.1,15.7,4.79,79.2,27.6,0.84,63.5,7.95,83.9,32.2,2.28,73.6,13.4,38.6,51.6,37.3,12.8,27.7,4.86,2.16,30.2,4.23,2.28,65.6,1.08,1.54,2.31,78.9,47.9,7.26,44.6,19.2,51.2,28.5,95.5,2.86,25.3,60.5,5.76,0.27,7.91,91.5,6.31,84.0,9.43,58.5,33.0,6.3,7.7,4.84,60…
036,2.8,5.4,2.84,31.6,9.16,75.3,14.8,0.3,8.59,3.25,22.4,1.73,45.5,65.3,17.3,21.0,19.7,37.4,13.1,73.8,49.8,2.02,2.77,1.65,18.5,1.2,30.4,79.2,4.79,6.28,15.1,8.34,76.2,18.3,1.26,30.8,7.38,84.4,70.5,4.95,90.3,15.5,10.9,10.5,49.1,33.3,26.9,5.18,2.55,15.4,18.3,4.58,67.6,7.16,4.2,3.14,80.6,58.4,10.2,31.0,19.8,58.4,21.2,91.0,4.45,2.78,81.3,8.86,1.08,18.6,79.1,9.82,78.9,10.9,57.9,36.4,3.99,7.13,4.86,79.7,…
037,3.37,9.01,2.86,28.7,1.59,84.1,14.0,2.55,7.79,2.01,38.0,2.54,12.8,48.7,35.2,31.8,24.4,39.2,19.0,29.8,31.7,6.59,2.69,1.19,16.8,1.36,2.97,82.9,4.35,9.59,13.5,1.47,84.9,30.9,0.57,31.8,4.34,83.7,45.8,2.86,62.2,18.9,28.2,8.01,35.5,9.85,7.86,3.29,1.68,14.0,15.5,2.96,58.6,0.97,1.7,0.37,83.8,55.2,11.2,33.4,10.3,58.6,30.5,91.5,3.45,3.06,81.0,8.63,0.77,14.4,83.4,1.66,90.3,7.83,67.5,25.4,4.93,6.02,5.03,6…
038,4.04,7.36,1.25,42.6,5.49,82.4,11.9,0.62,7.12,1.78,38.6,2.41,14.3,37.2,12.7,16.1,14.5,40.4,9.52,40.0,55.6,2.91,2.13,2.33,43.6,2.46,25.1,85.0,5.02,7.78,10.5,5.28,84.0,25.0,0.76,23.9,5.53,86.4,38.7,2.16,75.7,20.2,18.7,0.053,21.6,55.4,26.4,4.6,2.92,9.65,1.73,3.27,48.4,3.03,5.78,0.035,86.0,51.0,9.89,38.9,7.28,70.4,22.0,84.9,6.08,2.92,78.7,11.6,0.39,12.9,86.4,6.05,88.3,5.4,77.0,18.7,1.79,7.1,2.15,5…
039,3.32,5.45,5.81,27.9,5.5,72.3,22.1,0.47,7.57,2.43,27.5,1.79,42.5,64.6,22.1,24.3,22.7,42.1,14.7,52.9,34.2,1.93,1.55,0.97,17.4,0.78,14.9,79.0,5.16,5.74,20.8,5.22,73.8,15.3,0.79,27.8,7.28,77.8,48.3,2.82,84.7,16.8,20.5,17.3,39.0,26.9,18.3,3.87,1.59,10.7,25.0,7.87,75.2,1.69,6.32,7.2,79.6,56.3,10.9,32.7,18.6,57.2,23.3,94.6,2.15,1.56,85.9,7.19,0.56,30.5,68.5,6.31,79.8,13.6,67.1,21.0,10.6,6.85,10.7,65…
040,2.09,5.21,0.99,11.2,2.59,77.3,19.7,0.26,8.17,3.24,31.3,2.78,45.6,38.3,18.9,23.4,20.2,35.7,13.5,57.8,21.6,6.98,3.2,3.55,28.4,3.78,29.3,78.2,3.39,6.02,18.9,2.36,78.6,32.5,0.41,28.0,5.57,78.3,37.1,1.52,68.7,4.44,37.6,34.6,21.3,39.6,14.8,3.83,3.43,6.95,9.54,1.36,53.2,0.37,3.64,9.86,79.6,65.3,6.37,28.1,9.98,60.7,28.3,88.7,6.23,3.61,85.4,4.34,0.71,37.4,61.3,3.98,83.0,12.9,72.1,24.4,2.24,4.29,1.28,6…
041,8.77,4.27,6.2,45.0,2.65,78.3,18.7,4.39,10.0,3.48,20.3,2.72,36.0,58.0,50.9,35.2,28.5,49.1,17.0,46.0,30.4,16.8,4.27,1.3,37.1,1.01,9.27,59.0,9.01,4.82,21.3,4.25,74.1,40.3,1.78,17.6,5.07,72.9,30.4,2.19,79.5,26.1,38.2,6.95,40.0,15.7,25.3,2.93,1.25,10.9,11.1,2.42,63.6,1.03,2.08,0.34,58.6,49.1,7.86,42.7,17.4,66.9,15.1,94.9,2.51,4.3,81.5,5.92,0.78,33.2,65.5,4.3,84.9,10.4,50.0,35.5,12.8,15.3,12.7,63.8…
042,6.11,11.2,7.3,35.8,2.84,87.4,9.76,0.87,9.61,2.06,36.1,1.58,20.3,52.5,19.6,20.8,17.9,50.5,13.8,30.6,32.9,1.82,2.82,0.69,31.2,0.64,5.1,81.2,7.19,12.2,9.73,2.83,87.4,32.1,0.56,41.4,4.57,86.9,45.3,1.46,87.4,13.3,38.9,10.7,37.7,21.8,9.46,3.09,1.58,9.67,20.4,2.19,77.1,1.64,4.46,2.01,81.9,58.7,10.6,30.4,8.44,45.5,45.4,87.8,5.88,4.45,82.2,6.91,0.72,20.7,78.2,3.3,90.0,6.47,57.0,29.7,12.1,9.48,12.5,55.…
043,3.84,16.6,2.85,22.5,2.4,73.9,23.0,1.03,5.39,1.57,14.9,2.25,30.9,48.7,32.2,37.0,26.9,41.8,16.7,50.3,19.6,7.59,3.17,1.31,23.2,2.43,15.1,67.6,4.38,17.5,22.0,3.33,74.7,31.5,0.7,45.2,5.49,77.5,73.1,8.82,79.1,6.57,32.1,25.0,32.6,18.4,16.8,6.15,2.06,17.0,15.9,5.05,65.7,0.78,3.49,2.97,67.6,41.7,3.28,54.8,8.48,56.6,34.2,87.4,5.22,4.26,84.2,4.41,0.9,21.7,76.2,3.69,79.0,16.9,67.7,23.7,7.51,7.07,6.55,51.…
044,5.01,5.52,3.2,42.1,1.55,77.9,20.0,1.93,7.55,1.95,7.9,2.62,42.3,76.1,43.8,44.7,29.1,39.8,24.6,77.9,63.2,10.1,7.51,4.43,5.09,3.02,56.7,65.6,4.97,6.96,21.7,3.38,74.6,12.5,0.6,38.0,6.34,79.0,42.6,1.69,77.5,20.9,34.0,21.9,57.8,30.4,34.8,4.21,2.05,20.2,5.79,8.6,75.5,1.64,4.43,1.3,70.2,52.7,7.56,39.5,16.7,65.2,17.7,82.2,4.89,13.4,75.0,4.04,0.88,20.0,78.5,3.43,82.8,12.7,50.2,39.8,7.16,7.56,5.5,79.3,7…

## Sheet: data_all_fc022_cd56
# raw data obtained from the flow cytometry experiments fc021 using 2 antibody panels and the PBMCs from 30 donors, and gating on CD56+ cells. Donor Id are in index. Each column contains the frequency of the indicated subset among the indicated population for each donor (row)
donor,cd56+|live,nk|cd56,nkt|cd56,tcrgd|cd56,"cd16+,cd16b+|live","cd16+,cd16b-|live",cd16hi|cd56,cd16int|cd56,cd16b+|cd56,cd32+|cd56,cd64+|cd56,fcrl3+|cd56,fcrl5+|cd56,fcrl6+|cd56,pct_cd56,cd16+|cd56,cd57+|cd56,pd1+|cd56,nkg2a+|cd56,nkg2c+|cd56,nkg2d+|cd56,nkp30+|cd56,nkp44+|cd56,nkp46+|cd56,kir2dl1+|cd56,kir2dl2+|cd56,kir3dl1+|cd56
015,13.3,52.9,35.8,11.3,25.4,12.1,42.8,18.7,1.21,1.98,0.8,12.3,0.32,59.3,16.1,53.7,52.3,10.5,33.3,13.4,88.4,19.8,5.05,37.8,14.9,32.3,0.052000000000000005
016,8.83,91.2,8.36,0.46,24.5,8.25,44.3,32.3,1.47,6.52,0.92,24.7,0.92,50.4,11.1,52.7,15.1,7.92,34.7,9.57,69.8,34.3,6.44,54.9,18.4,16.4,0.14
017,9.52,65.2,19.6,15.1,11.8,6.6,41.8,22.2,3.28,2.67,0.57,14.0,0.49,13.0,12.3,53.7,14.3,8.65,45.1,5.2,79.7,23.2,6.44,53.1,13.7,18.3,7.53
018,6.61,93.3,4.97,1.57,26.9,7.15,42.8,36.7,1.25,2.32,1.01,24.8,0.75,14.3,7.08,72.5,17.5,4.38,43.6,7.81,85.3,61.0,8.55,79.0,23.2,33.0,13.3
019,11.4,83.1,2.17,14.8,23.7,11.6,54.7,32.6,0.75,2.93,0.78,38.0,0.88,59.2,13.7,70.0,39.0,3.11,53.7,11.9,90.1,34.9,4.56,68.2,27.8,18.3,30.8
020,14.0,49.5,38.5,12.0,17.5,12.2,37.0,32.6,1.89,3.32,0.93,19.3,0.53,48.3,17.6,53.6,71.6,7.87,27.9,22.2,88.8,18.4,4.59,26.7,3.42,40.0,5.81
021,11.6,30.2,20.6,49.2,11.5,5.95,21.7,22.4,3.97,2.66,0.66,9.05,0.39,30.0,12.4,39.5,27.5,27.5,20.3,5.09,82.3,10.6,2.38,25.0,10.4,17.4,17.0
022,9.73,36.6,51.8,11.5,13.8,12.6,19.3,40.3,0.52,2.84,0.8,37.5,0.57,51.9,11.4,55.3,42.2,23.6,32.1,5.16,85.5,11.2,4.44,25.6,0.17,35.8,19.9
023,21.3,34.0,13.5,52.4,10.0,16.9,27.3,34.4,0.42,1.41,0.97,24.5,0.75,28.3,21.6,55.9,48.3,19.5,62.8,3.12,91.8,16.9,4.92,29.5,3.5,14.1,11.2
024,23.4,62.2,33.6,4.17,11.4,26.7,52.6,24.8,0.3,1.59,0.56,26.0,0.63,68.6,28.4,67.6,46.4,3.01,24.9,0.92,93.0,13.1,4.66,46.0,13.6,24.0,0.048
025,18.8,33.3,57.9,8.8,17.3,11.3,27.8,20.0,0.55,3.14,0.76,35.9,0.43,77.1,20.7,45.0,72.2,27.5,14.8,9.39,87.0,17.6,4.56,27.3,3.23,22.6,19.1
026,12.6,77.0,20.2,2.73,11.1,11.0,59.6,10.6,0.44,3.47,1.02,30.2,0.63,53.9,14.1,68.3,45.4,12.3,28.8,27.6,90.9,35.5,4.75,55.4,15.9,27.7,34.9
027,11.9,41.1,46.2,12.6,11.4,9.7,28.7,24.1,0.38,3.61,0.95,32.3,0.59,45.8,13.2,45.6,42.2,16.2,29.3,20.4,89.5,17.1,3.31,35.1,12.8,13.9,0.1
028,9.71,65.8,20.6,13.5,10.6,9.66,52.8,16.1,0.31,3.01,1.72,43.2,0.73,33.6,12.6,62.3,45.2,8.42,43.2,12.1,89.6,16.1,3.19,47.4,16.3,20.3,6.91
029,15.2,43.0,46.7,10.3,17.9,12.0,24.2,44.1,0.15,2.57,0.51,10.8,0.57,60.3,15.3,63.3,38.4,12.4,21.5,13.6,86.9,16.7,2.54,36.2,17.6,25.9,0.07200000000000001
030,23.5,58.3,29.3,12.4,16.4,27.3,51.2,29.6,0.37,2.95,0.61,23.5,0.62,74.8,27.0,76.3,64.4,10.4,9.94,20.3,88.0,17.8,2.96,36.6,9.12,31.6,6.89
031,9.15,42.7,29.8,27.5,16.1,10.8,29.0,36.0,0.6,2.51,1.08,51.7,0.65,51.2,10.9,57.3,56.7,24.0,30.3,4.34,91.2,18.0,4.69,32.1,13.0,12.2,3.69
032,36.7,15.5,82.7,1.78,14.0,9.29,12.4,34.2,0.21,1.49,0.69,23.0,0.69,25.2,36.4,47.2,20.5,1.64,36.6,4.66,83.0,7.77,1.87,14.8,2.87,13.5,1.65
033,11.1,66.1,30.8,3.09,7.31,13.1,50.5,30.9,0.4,3.41,1.68,42.7,1.05,64.1,12.5,76.1,37.9,9.2,55.0,21.1,90.1,33.9,4.54,54.7,13.8,30.4,13.8
034,17.0,49.0,39.6,11.3,12.9,14.3,44.6,16.5,0.96,2.25,0.93,35.5,0.54,60.2,19.3,59.0,51.3,7.91,22.6,23.5,86.4,19.5,3.11,38.5,15.2,33.9,7.77
035,14.8,78.0,18.8,3.14,13.0,11.6,58.6,9.49,0.68,3.1,1.25,28.7,0.85,32.5,16.6,64.3,26.0,10.8,32.6,3.76,86.5,54.3,6.46,66.3,11.6,31.8,40.8
036,7.46,67.7,21.9,10.3,14.9,9.09,48.4,26.2,0.31,3.04,1.62,28.1,0.45,58.1,9.18,69.0,27.3,10.8,59.7,6.49,90.5,24.4,5.3,58.3,14.0,10.0,8.84
037,10.8,77.9,15.4,6.69,17.9,11.2,61.3,18.3,4.02,3.78,0.99,34.9,0.7,14.0,12.0,72.9,25.6,3.71,44.5,4.19,79.4,27.9,3.34,66.0,17.1,23.9,6.53
038,10.6,65.5,29.5,4.92,22.5,12.2,52.2,14.0,0.39,2.62,1.16,38.8,0.7,23.5,11.4,63.8,38.3,10.5,28.2,4.19,76.5,22.2,5.95,58.6,16.0,16.7,0.062
039,7.58,65.2,16.8,18.0,15.0,8.84,51.4,23.0,0.65,2.44,1.06,31.3,0.2,49.7,9.14,64.0,23.0,10.2,45.7,7.95,91.5,20.5,4.79,49.7,12.4,19.4,14.6
040,6.76,73.3,25.3,1.45,11.7,7.23,61.7,9.8,0.69,3.95,1.35,33.3,0.82,54.5,8.24,61.5,38.4,6.69,32.7,3.23,77.5,22.8,4.48,56.3,6.26,29.1,27.7
041,9.61,42.4,29.4,28.2,22.3,7.32,27.3,22.3,3.75,3.23,1.26,30.8,0.42,32.3,10.9,37.0,30.3,22.9,24.1,4.97,86.8,13.2,2.64,33.2,13.4,21.6,3.87
042,15.1,70.9,12.9,16.2,10.8,14.2,57.0,21.8,1.3,2.44,0.65,39.5,0.26,23.4,17.8,70.6,29.9,5.54,42.0,3.37,91.8,31.8,3.43,59.9,11.4,30.6,7.98
043,18.2,84.2,12.5,3.27,25.8,15.9,44.2,33.7,2.9,3.28,1.07,20.1,0.49,39.7,19.1,68.8,30.4,5.22,68.1,11.2,87.6,43.6,4.34,70.5,6.79,30.4,22.0
044,7.98,64.1,20.7,15.1,21.2,9.45,35.1,45.1,4.81,4.64,1.99,10.5,0.84,56.9,9.25,75.2,22.9,17.2,34.3,8.31,88.6,28.1,4.34,62.4,15.5,29.0,15.9

## Sheet: metaanalysis_tx006
# raw data obtained from the ADCC experiment tx006 using the PBMCs from 19 donors. Data are EC50, top and bottom (upper and lower asymptotes resp.) extracted from the 4P fitting for each donor and E:T tested
,donor,E:T,EC50,top,bottom
0,015,30:1,-2.2602780303052112,47.48881755564996,-2.213419148455974
1,015,15:1,-2.398303733992041,33.66081317088259,-0.6974155214636136
2,015,6:1,-2.2786881068996796,18.48839382608601,-3.781328524021307
3,015,3:1,-1.6965955202723015,8.125543760922202,-4.857238513278043
4,017,30:1,-2.379792684666274,43.7972705924693,-3.112202510112633
5,017,15:1,-2.2285314724601366,31.520414300851087,-2.9405427443614656
6,017,6:1,-2.601961135302609,12.191211452352738,-3.8934154266865058
7,017,3:1,-2.136860718479086,3.5472122130143284,-3.339574679453402
8,018,30:1,-2.2975048714607835,13.725673542373153,-2.5891953615986236
9,018,15:1,-2.4758456234655237,9.059791706936071,-3.1382637791093617
10,018,6:1,-2.480109049264544,2.048027130446928,-3.4111065198372827
11,018,3:1,-0.9305217530733875,1.024341088490453,-3.2781107233011086
12,019,30:1,-2.79459422734421,38.385136317891074,-4.977536654144954
13,019,15:1,-2.843707312626739,26.83146052360321,-3.066483963354079
14,019,6:1,-2.94405067734522,13.51915397038657,-5.01448709258226
15,019,3:1,-2.183874368912307,7.256336198946568,-5.020421431561688
16,020,30:1,-2.1796164411585153,60.673599171795225,-1.9719616491201402
17,020,15:1,-2.149186820657157,43.74461428369753,-1.4441152866537434
18,020,6:1,-2.187879484241492,22.00260387376623,-3.7488801841412576
19,020,3:1,-1.310821199959043,16.894828710654938,-4.092151750064138
20,021,30:1,-1.9433109897289724,27.42336051415304,-2.00125445196027
21,021,15:1,-1.3080484244307182,23.368961819390094,-2.268628945352683
22,021,6:1,-1.7467361342619694,6.036211171884966,-1.5976163098438727
23,021,3:1,-0.8385781612268741,4.81791000091573,-2.9494085375470793
24,022,30:1,-1.8685562436771361,34.994837242681726,0.939641128994104
25,022,15:1,-1.7349120934333844,25.2174450678393,0.7510201567838902
26,022,6:1,-1.3574169319353868,14.856801610734388,-1.7434164046484402
27,022,3:1,-1.9838414120466092,4.614437562116205,-3.4946241542956216
28,023,30:1,-2.10643286073101,58.95152365715966,3.7941946288061232
29,023,15:1,-2.2315821939230647,46.772263448213,1.2086157474359125
30,023,6:1,-2.2586690017652673,23.041843926240297,-0.6772060113225377
31,023,3:1,-1.9422657438556281,15.173233082520458,-3.5731329304292614
32,024,30:1,-3.097106712553674,108.1203057884748,5.749455621240032
33,024,15:1,-2.971242092624978,94.65608542585898,3.9174839856903647
34,024,6:1,-2.849596585812294,59.65040541807878,1.9108097066979748
35,024,3:1,-2.581932583938058,29.25001947639426,-1.300641465000313
36,025,30:1,-3.5141649305055114,68.24138289034956,17.66929310088182
37,025,15:1,-3.3617087994721953,52.827110964762305,12.861285304439747
38,025,6:1,-3.313928852495615,29.318697164267828,4.587391564865871
39,025,3:1,-2.9293644552932085,16.381774105016227,0.7983534964547649
40,026,30:1,-2.6180445861033363,66.31413290592215,4.083828419944846
41,026,15:1,-2.4828277001288326,47.24920088956759,3.475715583815522
42,026,6:1,-2.367030234045396,25.832411116445233,1.4421748572382505
43,026,3:1,-2.385162298055338,15.174775640101918,0.20433497735191972
44,027,30:1,-1.937926890945628,46.109573482365505,2.8054698028514764
45,027,15:1,-1.7851956567026472,36.08884425896887,1.5344457640143636
46,027,6:1,-1.8729439603486355,17.648741247909122,-0.30648201651826845
47,027,3:1,-2.040842496439341,8.235467013351348,-1.6314167649488014
48,028,30:1,-2.9465279414844874,69.11245264284918,1.6878698631783409
49,028,15:1,-2.6768502457637,53.45035403044844,0.3483442626250619
50,028,6:1,-1.782684694630427,34.82016589352788,-2.406848138034845
51,028,3:1,-2.190476766736605,14.801456563179544,-2.00358558860836
52,029,30:1,-2.963583834997821,59.48315585005298,4.567198568180084
53,029,15:1,-2.884288662812311,41.73125001823286,3.1151487630919146
54,029,6:1,-2.533615311774379,22.213691018183685,2.2263815583350466
55,029,3:1,-2.1628879466716096,12.560817352066286,1.3943514469104676
56,030,30:1,-2.9308883121678018,106.6178781962256,15.881421833248258
57,030,15:1,-2.9225129682782156,86.16137091124874,15.20658616713423
58,030,6:1,-2.7520668151754037,60.862443706363315,8.342023090933699
59,030,3:1,-2.5659019351852272,37.041792094298756,3.838430399872307
60,031,30:1,-2.574047310638205,54.35251329616435,5.290605668260191
61,031,15:1,-2.416268611128982,41.64576232352041,2.9932987823949357
62,031,6:1,-2.2841685953441524,21.238383944800834,1.4225354554158713
63,031,3:1,-1.9041765114054474,12.894080531777478,1.200871156067811
64,032,30:1,-2.8408160837868124,68.8850545898573,3.7315491669864174
65,032,15:1,-2.8177105930313173,52.32319369304278,1.545407788872424
66,032,6:1,-2.818847597533225,23.797433761397034,1.6827717517451983
67,032,3:1,-2.3824934986982735,14.761106462144083,0.6788146809494288
68,033,30:1,-2.9296521513974763,64.86624816300974,4.151853666519472
69,033,15:1,-2.9388677896663795,47.00740584451378,4.758310828040795
70,033,6:1,-2.990075167015733,20.570507087836546,1.2266081878107666
71,033,3:1,-2.925933995234912,10.669797417165162,1.0327736930185594
72,034,30:1,-3.0662462652581084,82.94389854167109,10.088622908100918
73,034,15:1,-3.0537307832596494,64.7605839939748,7.52810089390987
74,034,6:1,-2.711979087276674,35.689573283756516,4.146505915784423
75,034,3:1,-2.847172611564928,21.17708365213724,1.8293290522088757

## Sheet: metaanalysis_tx007
# raw data obtained from the ADCC experiment tx007 using isolated CD56+ cells from the PBMCs from 30 donors. Data are EC50, top and bottom (upper and lower asymptotes resp.) extracted from the 4P fitting for each donor (E:T=5:1)
,donor,EC50,top,bottom
0,015,-3.2503136685487717,51.37818497493935,-1.4959987941169963
1,016,-2.3559259625183353,33.61651665527311,-5.064766308163871
2,017,-3.0235698957522557,53.59481993300314,-5.559942185777747
3,018,-2.554070771023136,59.77814525694708,-3.319961299928833
4,019,-3.045573354414965,43.967242001970135,-5.068841693933023
5,020,-2.9659222138100088,29.52240531315602,-5.204671834921182
6,021,-2.528873753965785,42.972480751298825,-4.671823950558894
7,022,-3.4384616705020457,43.96464065981254,-4.857047805945874
8,023,-2.8288260974589226,65.26445950380433,-3.671585977877911
9,024,-3.2900177793250607,78.34922056910425,-7.52583503280687
10,025,-2.7037956388075832,69.70011737843421,9.312719976203573
11,026,-2.7591837059771813,58.28919232041959,-0.6077124877808949
12,027,-2.7940785542420072,71.38242689526558,-2.698695730799222
13,028,-2.9384687622918606,77.59500948856466,-2.0620289832863086
14,029,-2.9987324584553914,60.87927451376884,13.063869966636332
15,030,-3.3924744584900157,61.91836228106967,2.938414539079621
16,031,-2.718086635848584,39.118224975071115,-6.185240872763181
17,032,-2.929441415598437,39.170153956265345,-5.679440267811391
18,033,-2.9864697452919584,58.29973073575938,-1.4852748135039564
19,034,-3.405152143558145,71.51914157914449,1.4800044369856247
20,035,-2.9461600679637447,63.74943558763268,13.92224903311304
21,036,-2.9965216011151514,80.58374437281503,-0.09547837223562115
22,037,-3.0762807691741854,90.68392951577425,-11.151898866167626
23,038,-3.4639798974941427,84.63553794220248,-6.223364412241521
24,039,-3.3100988110891367,70.79100935301175,1.2350724945182678
25,040,-3.3633129931776535,49.52432561130293,-1.8356372183218659
26,041,-3.086775132206995,39.576168158697925,4.26708951130566
27,042,-3.195046661911108,47.92011891315315,-4.191646858073955
28,043,-2.640235938456981,51.99242655904181,2.570441201618593
29,044,-3.141251617283113,66.84372874557396,-4.015555121334363

## Sheet: metaanalysis_tx012-014
# raw data obtained from the ADCC experiments tx012-014 using isolated CD56+ cells from the PBMCs from 22 donors and testing the 6 trastuzumab (TRA) glycovariant antibodies. Data are antibody, EC50, top and bottom (upper and lower asymptotes resp.) extracted from the 4P fitting for each donor (E:T=5:1)
,donor,antibody,EC50,top,bottom
0,015,TRA,-1.813248860932456,48.94440764036032,1.1715893371524249
1,015,deglyc,-0.024385861311788888,6.911961417048102,1.5442449605439736
2,015,G0,-1.702735033092161,50.30964280256649,0.8118821905983555
3,015,G2,-1.8106831021487104,49.038034008167685,1.1543250265662095
4,015,ST3,-1.4984146717359326,44.259777668902494,0.21209681997458266
5,015,ST6,-1.9026573579106882,43.0308237643608,0.2846829308539496
6,024,TRA,-2.4668049849939493,63.381412382057505,3.1536137027295177
7,024,deglyc,0.000491796684679077,25.77761263947754,3.0891873346732672
8,024,G0,-2.3462850010449685,62.43655796408322,3.755542603738639
9,024,G2,-2.4535304803671467,62.98174696001439,3.498869301835572
10,024,ST3,-2.1386762990170247,61.88566497285758,1.754470843286848
11,024,ST6,-2.4004055385697347,56.17994445698986,1.2927813965095432
12,025,TRA,-2.941425950940553,57.4856330165122,20.41882780027385
13,025,deglyc,-0.20658189149383796,43.07717950556263,22.76800528207394
14,025,G0,-3.1415332859559717,56.619980848531284,11.780428202680433
15,025,G2,-3.1336656101655147,55.22232347779544,16.888898979634067
16,025,ST3,-2.7970361638552563,48.43694288160663,18.08803960318453
17,025,ST6,-3.2045520675052583,44.390188232527095,14.796705825812564
18,032,TRA,-1.8817674000030995,26.070354075396047,1.8866167009382269
19,032,deglyc,17.00223543801907,28737.457472909555,0.75944145201624
20,032,G0,-1.7181858266175036,25.6176789607348,1.7837415485902577
21,032,G2,-1.6686190474789462,27.200767739826546,0.7757439548904883
22,032,ST3,-1.5192971807545972,25.476162118298568,0.440229971390739
23,032,ST6,-1.7991906176290395,24.11051151163062,0.15815959067589885
24,035,TRA,-1.9423863596194757,61.45413727444045,15.642747141877768
25,035,deglyc,0.03060762004509042,21.884424276327568,16.651476513963047
26,035,G0,-1.9410073728873551,61.26418306562813,17.727745377824775
27,037,TRA,-2.4086990535541277,62.48113405650231,2.3079950858312857
28,037,deglyc,0.024177046242104587,20.90494397607188,3.312784158062186
29,037,G0,-2.220347517708775,61.513541964048564,2.138554915927997
30,037,G2,-2.4495557403464088,56.327757926660865,1.5039919844108147
31,037,ST3,-2.0216860438907025,55.22725358080923,1.4076437033896119
32,017,TRA,-3.11351398578914,57.37167934842001,3.175985224418128
33,017,deglyc,2.219210805286829,3480.891435129768,3.0415197248953105
34,017,G0,-2.8702851918302055,55.59519114483074,2.4300581393009058
35,017,G2,-2.9823454003758614,58.44787931623652,2.6996460263924904
36,017,ST3,-2.703577467845957,56.421122565204755,2.054329081112636
37,017,ST6,-3.082711096910593,51.441320075871445,1.6257266846285192
38,020,TRA,-3.16503337415686,51.655998727062595,2.713536654440771
39,020,deglyc,7.652109772252421,32676.096785075053,2.597699367884488
40,020,G0,-2.8885140545205354,52.25144141112268,2.7618031620289103
41,020,G2,-3.191720827921817,50.705618614415286,1.5234760920166561
42,020,ST3,-2.9315424152359433,47.123067883688535,1.1130109277390705
43,020,ST6,-3.259441323059292,50.354104100518825,1.4416549219026042
44,021,TRA,-3.0114049010878965,44.20557807938202,2.2041215680622
45,021,deglyc,8.104996613004838,108812.06570563151,2.100209531851156
46,021,G0,-2.683608580135616,44.747761130663584,1.93997762905574
47,021,G2,-2.9150053723189737,43.87649892816075,2.8428120531078203
48,021,ST3,-2.536850109086107,43.42565977299678,1.6007284259662395
49,021,ST6,-3.1081023495093945,41.644281446852936,0.8898925002900443
50,023,TRA,-3.1844876063724024,59.56293351774042,6.385263154917915
51,023,deglyc,7.412592061134683,280779.62964548985,5.300877512492027
52,023,G0,-2.797643977611388,60.84848998649265,5.158918799025297
53,023,G2,-3.0205575684918307,62.72310705907056,3.926437707830726
54,023,ST3,-2.8050180266119584,56.520982177498006,3.1396775166206097
55,023,ST6,-3.1395159892482543,54.590247502488744,3.7227916430704537
56,029,TRA,-3.2274888007593914,53.465917740775616,2.5106341269631574
57,029,deglyc,-0.9053373641944866,14.317690514359937,2.006561124176085
58,029,G0,-3.136592975746275,50.795985415437485,1.756935150010218
59,029,G2,-3.1231986867315165,48.92200563650833,2.2637274357135464
60,029,ST3,-2.9221255989078982,45.973365026740524,0.7705452025014732
61,029,ST6,-3.079999317403168,47.43086926483807,0.142750269171124
62,034,TRA,-3.6123668621560903,66.77989909660009,12.58640105227157
63,034,deglyc,-0.9461218991162959,33.37310143332264,15.401564168409115
64,034,G0,-3.311789504168972,67.9734422220107,12.415523368375306
65,034,G2,-3.6575437438364435,67.7665773922904,12.358828681047894
66,034,ST3,-3.2669323577455,72.78850719305294,10.087131414999694
67,034,ST6,-3.4750888706488547,69.81921284343596,10.685120119765552
68,042,TRA,-3.760012059916968,58.056997288327246,6.947133882291657
69,042,deglyc,-1.0852471916333368,24.746995680336408,5.829263858037968
70,042,G0,-3.3919234233588784,56.86684482646066,4.8933002265956045
71,042,G2,-3.509725888237328,57.254760206344756,5.665413502023928
72,042,ST3,-3.202467808328728,62.61338836795391,3.1643983244187845
73,042,ST6,-3.692911068720051,55.02867413745191,5.300714456594942
74,043,TRA,-3.2841587115209108,70.737929971569,21.124454032498214
75,043,deglyc,-0.9745635083573716,40.356526143483,22.207526722988344
76,043,G0,-2.6422590449983123,77.80365389398305,20.239649238963963
77,043,G2,-3.2601749320994915,73.42416259395172,22.875622452086247
78,043,ST3,-3.0280373049822087,72.0454068862807,22.238026516780288
79,043,ST6,-3.3929878030017546,69.32695623150839,22.37923136085611
80,022,TRA,-2.558535184796958,45.61843605241246,5.248277891849804
81,022,deglyc,-1.0480498881227125,14.602279967377678,4.501933798948287
82,022,G0,-2.7302406430534822,43.569931533980544,3.5595095312031986
83,022,G2,-2.7807216948605102,41.578923951640775,2.9092688964406364
84,022,ST3,-2.5908745975418026,38.94389804231572,3.1246915863223443
85,022,ST6,-2.6973041118835788,39.53691292142946,1.2686836680963718
86,026,TRA,-3.1773146050221213,52.306137060493896,-0.05151610718027373
87,026,deglyc,5.518464076906864,81039.11316755811,0.5056435472603491
88,026,G0,-2.7228677645373964,56.24181629317315,0.4642629969660483
89,026,G2,-2.9142214505435624,55.925810825707465,-0.023839090639529974
90,026,ST3,-2.7301511206082605,52.379393087294034,-0.4745040632451936
91,026,ST6,-3.1737274376511397,51.62944239686361,-1.286099403562426
92,027,TRA,-2.7708997597971936,53.21109397389418,2.2083330179727825
93,027,deglyc,-0.7518914970995734,14.597874440168605,2.9497302083412933
94,027,G0,-2.6233800780308743,51.359671717230384,2.081026145975148
95,027,G2,-2.6795505397704398,51.37293852364562,1.0252410594337198
96,027,ST3,-2.2224840130603165,54.7905098080023,1.8937225402632916
97,027,ST6,-2.8595431262706312,53.75825676069145,-0.2020290458907074
98,028,TRA,-3.8248271665561684,54.28301234244164,5.152729875564941
99,028,deglyc,-0.9680136602793782,16.698386409711595,5.320048054253424
100,028,G0,-3.574022103814113,53.84645238724866,4.199858599217654
101,028,G2,-3.7299939793797727,54.557679148932294,3.920565740981681
102,028,ST3,-3.2857628562659764,50.66655677559151,4.861831997553751
103,028,ST6,-3.6063899249644447,49.730977138663455,3.2365977869135496
104,031,TRA,-3.468316107519558,37.16920493816231,-1.5913953956635298
105,031,deglyc,-1.0032527688083022,8.348465385074158,-2.3083396753666388
106,031,G0,-3.2392000284288955,45.13475230825168,-1.9091522890407395
107,033,TRA,-3.5693316104909,57.94199497517533,5.085283301221543
108,033,deglyc,-1.0548678557655078,26.89691330306844,3.5728881042237814
109,033,G0,-3.4920176675147934,59.81730543255429,2.4088014222314644
110,033,G2,-3.3844850113434504,58.69772237718127,1.1316729279823392
111,033,ST3,-3.0861474144456165,59.70657392279284,2.350225314229832
112,033,ST6,-3.4524144510921877,58.80098877057856,1.5882793061416205
113,038,TRA,-3.947323168233949,55.6172721488817,12.010779391134298
114,038,deglyc,-1.1350158906710108,42.74439329279375,9.320884078291185
115,038,G0,-3.9322801837463,57.30630969089404,8.353256159884044
116,038,G2,-3.977981492176715,57.59352038810811,7.460536735309786
117,038,ST3,-3.7681834401076375,55.85700682283047,5.131202439357817
118,038,ST6,-4.122605369639982,53.17690342871569,4.557119312679972
119,044,TRA,-3.275659242297053,59.81997537444679,0.7444353070222024
120,044,deglyc,-0.7043543332073154,19.648422790211374,0.7260276706151735
121,044,G0,-2.9877492497682367,66.55620132591305,-0.8842946755876194
122,044,G2,-3.1061463110069107,64.63275647794569,-0.4806375076997912
123,044,ST3,-2.8805416747895918,60.354708686917704,-0.24168802571064135

## Sheet: raw_data_tx012-014
# raw data points obtained from the ADCC experiments tx012-014 using isolated CD56+ cells from the PBMCs from 22 donors and testing the 6 trastuzumab (TRA) glycovariant antibodies. Data are antibody, percent_spe_release (ADCC) and log10 concentration (conc) for each donor (E:T=5:1), all in duplicates [nothing to hide	-]
,donor,antibody,percent_spe_release,conc
0,015,TRA,47.49422960327592,1.0
1,015,TRA,44.95799279874782,1.0
2,015,deglyc,5.714320715112499,1.0
3,015,deglyc,7.770977251676659,1.0
4,015,G0,47.79798109662795,1.0
5,015,G0,48.89970901541176,1.0
6,015,G2,46.99482613977882,1.0
7,015,G2,49.36095097140309,1.0
8,015,ST3,43.33083883206855,1.0
9,015,ST3,46.49436469674486,1.0
10,015,ST6,44.497251990958176,1.0
11,015,ST6,41.46445156274249,1.0
12,015,TRA,49.267032086199215,0.1
13,015,TRA,54.57931439028191,0.1
14,015,deglyc,3.788482420231516,0.1
15,015,deglyc,4.877050558460068,0.1
16,015,G0,55.4586067516975,0.1
17,015,G0,48.0834685221854,0.1
18,015,G2,48.0978533316781,0.1
19,015,G2,49.9178194286929,0.1
20,015,ST3,41.20181278297279,0.1
21,015,ST3,42.83730065863556,0.1
22,015,ST6,43.42965783302218,0.1
23,015,ST6,41.88311448263547,0.1
24,015,TRA,37.29636484727492,0.01
25,015,TRA,39.1409057672166,0.01
26,015,deglyc,1.801615411012524,0.01
27,015,deglyc,1.8073878958541039,0.01
28,015,G0,40.42313984382799,0.01
29,015,G0,42.23584857244068,0.01
30,015,G2,39.7912105225531,0.01
31,015,G2,42.791956026905716,0.01
32,015,ST3,33.51033867193314,0.01
33,015,ST3,33.884956233211724,0.01
34,015,ST6,40.129002971530426,0.01
35,015,ST6,40.34061743995122,0.01
36,015,TRA,23.833408191056996,0.001
37,015,TRA,21.297022898172838,0.001
38,015,deglyc,0.9313622782716968,0.001
39,015,deglyc,0.4644963257948381,0.001
40,015,G0,14.7209005125849,0.001
41,015,G0,20.876633801140738,0.001
42,015,G2,18.235805510817425,0.001
43,015,G2,22.95088620789725,0.001
44,015,ST3,11.525468212401574,0.001
45,015,ST3,10.54494391424649,0.001
46,015,ST6,17.379250428922536,0.001
47,015,ST6,19.78711904964235,0.001
48,015,TRA,4.522460364204198,0.0001
49,015,TRA,1.952052676739272,0.0001
50,015,deglyc,3.73563912652096,0.0001
51,015,deglyc,2.0321992669191755,0.0001
52,015,G0,3.3850766789230406,0.0001
53,015,G0,2.2065060358815303,0.0001
54,015,G2,4.782964623855639,0.0001
55,015,G2,4.0767725635094765,0.0001
56,015,ST3,-0.7837710393693037,0.0001
57,015,ST3,1.7020168461896052,0.0001
58,015,ST6,3.782431519722333,0.0001
59,015,ST6,1.3688832193834732,0.0001
60,015,TRA,1.7979960073337178,1e-05
61,015,TRA,1.885140111292644,1e-05
62,015,deglyc,1.9948544453717052,1e-05
63,015,deglyc,1.527394539470634,1e-05
64,015,G0,0.20562543805998554,1e-05
65,015,G0,1.1481738391543828,1e-05
66,015,G2,2.7714299864872527,1e-05
67,015,G2,1.8469229206533608,1e-05
68,015,ST3,-0.14412032357963908,1e-05
69,015,ST3,-0.4968544133848382,1e-05
70,015,ST6,-0.5044644416325819,1e-05
71,015,ST6,0.7336500321863982,1e-05
72,015,TRA,1.6370717514606867,1e-06
73,015,TRA,1.0971680888499886,1e-06
74,015,deglyc,2.222784071913902,1e-06
75,015,deglyc,0.7329447124951437,1e-06
76,015,G0,2.16324024113643,1e-06
77,015,G0,0.205050045680279,1e-06
78,015,G2,0.6231004511045322,1e-06
79,015,G2,1.5328143644665913,1e-06
80,015,ST3,0.8884677044167301,1e-06
81,015,ST3,1.0696606208910695,1e-06
82,015,ST6,0.4141402120481796,1e-06
83,015,ST6,-0.7388161895740941,1e-06
84,015,TRA,2.3387349169472165,1e-07
85,015,TRA,2.2490479498908718,1e-07
86,015,deglyc,0.659220243714558,1e-07
87,015,deglyc,1.0418190541310297,1e-07
88,015,G0,2.2887129020016768,1e-07
89,015,G0,-0.12594906100758338,1e-07
90,015,G2,-0.38801244839758975,1e-07
91,015,G2,2.1271575706154167,1e-07
92,015,ST3,0.03000083493765305,1e-07
93,015,ST3,1.976237717731496,1e-07
94,015,ST6,-0.3369138928706621,1e-07
95,015,ST6,1.6230210407691192,1e-07
96,024,TRA,67.10100335747639,1.0
97,024,TRA,59.00036958133121,1.0
98,024,deglyc,26.125233161520963,1.0
99,024,deglyc,25.42999211743375,1.0
100,024,G0,61.33503344251661,1.0
101,024,G0,60.079972735063016,1.0
102,024,G2,59.04190919893718,1.0
103,024,G2,63.819744787494145,1.0
104,024,ST3,59.618842145338725,1.0
105,024,ST3,56.585633374143924,1.0
106,024,ST6,53.36557056790021,1.0
107,024,ST6,56.76832973522328,1.0
108,024,TRA,61.34214232256267,0.1
109,024,TRA,59.03322263010805,0.1
110,024,deglyc,14.056674973868368,0.1
111,024,deglyc,14.629116147499301,0.1
112,024,G0,63.250291942028774,0.1
113,024,G0,63.392989252196244,0.1
114,024,G2,61.09364705870706,0.1
115,024,G2,67.7157637125826,0.1
116,024,ST3,67.97934910562213,0.1
117,024,ST3,60.95583130324487,0.1
118,024,ST6,59.1825647942089,0.1
119,024,ST6,55.19982866918515,0.1
120,024,TRA,65.81143766828487,0.01
121,024,TRA,63.9364195132632,0.01
122,024,deglyc,4.454062915197032,0.01
123,024,deglyc,1.5206197582256908,0.01
124,024,G0,61.88263993859758,0.01
125,024,G0,57.673087849702064,0.01
126,024,G2,59.06791322229106,0.01
127,024,G2,63.547454264580956,0.01
128,024,ST3,58.052735454041965,0.01
129,024,ST3,56.302614567505856,0.01
130,024,ST6,54.67839324585863,0.01
131,024,ST6,51.645035986307754,0.01
132,024,TRA,49.34599076953069,0.001
133,024,TRA,39.71776446944012,0.001
134,024,deglyc,4.269436205488953,0.001
135,024,deglyc,-0.026888766475361047,0.001
136,024,G0,41.477370049719156,0.001
137,024,G0,44.123543920860406,0.001
138,024,G2,48.465287768732594,0.001
139,024,G2,47.65585917884022,0.001
140,024,ST3,31.412662227009182,0.001
141,024,ST3,38.472318383041,0.001
142,024,ST6,39.5618516955839,0.001
143,024,ST6,39.56008839635577,0.001
144,024,TRA,22.421915000500988,0.0001
145,024,TRA,17.30665818385686,0.0001
146,024,deglyc,4.1984773323398645,0.0001
147,024,deglyc,2.027577566837006,0.0001
148,024,G0,15.487471650711337,0.0001
149,024,G0,16.860988944206646,0.0001
150,024,G2,18.845368773461747,0.0001
151,024,G2,13.288062120846195,0.0001
152,024,ST3,12.96842237339643,0.0001
153,024,ST3,11.140307977843188,0.0001
154,024,ST6,16.707711838670367,0.0001
155,024,ST6,10.666221779053224,0.0001
156,024,TRA,6.1640177014206685,1e-05
157,024,TRA,2.7314680576643413,1e-05
158,024,deglyc,3.610370637145284,1e-05
159,024,deglyc,1.9751982992391202,1e-05
160,024,G0,4.480753697197656,1e-05
161,024,G0,5.112645896383528,1e-05
162,024,G2,5.226647831743638,1e-05
163,024,G2,4.0524390341612,1e-05
164,024,ST3,3.5982131529934,1e-05
165,024,ST3,1.6220001833212518,1e-05
166,024,ST6,2.6078515012497623,1e-05
167,024,ST6,2.2170301481168253,1e-05
168,024,TRA,4.083862882511033,1e-06
169,024,TRA,1.5344106142941651,1e-06
170,024,deglyc,0.548466491143119,1e-06
171,024,deglyc,4.0422861428160415,1e-06
172,024,G0,5.4449442761868605,1e-06
173,024,G0,4.462823728204191,1e-06
174,024,G2,4.622745687673863,1e-06
175,024,G2,2.3775460610107104,1e-06
176,024,ST3,2.6941046750723667,1e-06
177,024,ST3,1.4154157579617546,1e-06
178,024,ST6,1.32034608799847,1e-06
179,024,ST6,1.8885182213928609,1e-06
180,024,TRA,3.4611212782669645,1e-07
181,024,TRA,5.301133303348998,1e-07
182,024,deglyc,6.111397140244192,1e-07
183,024,deglyc,4.339244293878628,1e-07
184,024,G0,3.5945009440920628,1e-07
185,024,G0,2.891037357288382,1e-07
186,024,G2,5.369864851157284,1e-07
187,024,G2,2.179425471946266,1e-07
188,024,ST3,1.3437515651214096,1e-07
189,024,ST3,1.5624749135882843,1e-07
190,024,ST6,1.4336983868008482,1e-07
191,024,ST6,2.0820727935086594,1e-07
192,025,TRA,56.70915712533596,1.0
193,025,TRA,60.050108014451745,1.0
194,025,deglyc,45.165598081555174,1.0
195,025,deglyc,40.14446432160449,1.0
196,025,G0,62.132805696458796,1.0
197,025,G0,53.898606644043426,1.0
198,025,G2,58.654094735014326,1.0
199,025,G2,50.96174825488286,1.0
200,025,ST3,50.84861868861457,1.0
201,025,ST3,47.899621376346616,1.0
202,025,ST6,52.94536708131318,1.0
203,025,ST6,39.73922103688986,1.0
204,025,TRA,55.30261973366324,0.1
205,025,TRA,55.352920164276384,0.1
206,025,deglyc,35.031527635523695,0.1
207,025,deglyc,37.29606787056282,0.1
208,025,G0,46.014413207890776,0.1
209,025,G0,55.76723979975479,0.1
210,025,G2,52.368879599979785,0.1
211,025,G2,52.06297502546497,0.1
212,025,ST3,51.517503049502274,0.1
213,025,ST3,40.92905823394693,0.1
214,025,ST6,43.546963634304475,0.1
215,025,ST6,43.67364276306267,0.1
216,025,TRA,60.652803690628595,0.01
217,025,TRA,55.67916764357053,0.01
218,025,deglyc,26.460222892777768,0.01
219,025,deglyc,21.994658317001413,0.01
220,025,G0,51.747827050785816,0.01
221,025,G0,47.56279410168364,0.01
222,025,G2,56.60348909895934,0.01
223,025,G2,59.60597934149558,0.01
224,025,ST3,46.5139094766104,0.01
225,025,ST3,49.85419216812397,0.01
226,025,ST6,41.81052223756979,0.01
227,025,ST6,39.34873378255804,0.01
228,025,TRA,52.335358353600704,0.001
229,025,TRA,54.266857767056216,0.001
230,025,deglyc,23.85057715722569,0.001
231,025,deglyc,22.449700884127516,0.001
232,025,G0,40.321425319931315,0.001
233,025,G0,48.86887912048614,0.001
234,025,G2,48.7711552211584,0.001
235,025,G2,49.68846060172369,0.001
236,025,ST3,43.095577592946206,0.001
237,025,ST3,42.9721466469767,0.001
238,025,ST6,41.71443171015864,0.001
239,025,ST6,39.27909274356893,0.001
240,025,TRA,36.54449405639779,0.0001
241,025,TRA,38.76114679660965,0.0001
242,025,deglyc,24.18012850244203,0.0001
243,025,deglyc,20.85417493728764,0.0001
244,025,G0,34.42304091346077,0.0001
245,025,G0,41.594787217268504,0.0001
246,025,G2,35.20555598881845,0.0001
247,025,G2,39.91254407049336,0.0001
248,025,ST3,31.8330884461303,0.0001
249,025,ST3,27.55753328296897,0.0001
250,025,ST6,35.50674605802857,0.0001
251,025,ST6,28.059312560162926,0.0001
252,025,TRA,22.154617398560106,1e-05
253,025,TRA,25.17980779852803,1e-05
254,025,deglyc,25.783375843796684,1e-05
255,025,deglyc,25.51210617833136,1e-05
256,025,G0,25.73268563124891,1e-05
257,025,G0,21.847599161374887,1e-05
258,025,G2,27.235183623021218,1e-05
259,025,G2,23.654108501122337,1e-05
260,025,ST3,24.44358396817004,1e-05
261,025,ST3,20.40460787829102,1e-05
262,025,ST6,22.83092617725049,1e-05
263,025,ST6,22.10368589243373,1e-05
264,025,TRA,23.101416278846532,1e-06
265,025,TRA,22.764124978070893,1e-06
266,025,deglyc,27.042427175819217,1e-06
267,025,deglyc,20.918507517547837,1e-06
268,025,G0,20.990877030079442,1e-06
269,025,G0,18.532670856657482,1e-06
270,025,G2,20.507603114258664,1e-06
271,025,G2,15.195859080466676,1e-06
272,025,ST3,18.89006376863386,1e-06
273,025,ST3,18.48352121080375,1e-06
274,025,ST6,16.481545511356313,1e-06
275,025,ST6,14.741002123785648,1e-06
276,025,TRA,19.79729050203201,1e-07
277,025,TRA,17.2801530123013,1e-07
278,025,deglyc,18.728879658137735,1e-07
279,025,deglyc,18.55123190116417,1e-07
280,025,G0,16.313233959769615,1e-07
281,025,G0,15.272200656522706,1e-07
282,025,G2,18.41144867498426,1e-07
283,025,G2,16.478891281991853,1e-07
284,025,ST3,18.0336014919615,1e-07
285,025,ST3,16.920439969761578,1e-07
286,025,ST6,16.935270244322428,1e-07
287,025,ST6,16.12029190212254,1e-07
288,032,TRA,24.311243720837307,1.0
289,032,TRA,25.58930156243469,1.0
290,032,deglyc,5.375563091820839,1.0
291,032,deglyc,3.3826637431371687,1.0
292,032,G0,23.167159498489234,1.0
293,032,G0,25.46859909000768,1.0
294,032,G2,28.487311685442762,1.0
295,032,G2,26.645183701286964,1.0
296,032,ST3,24.73404575365528,1.0
297,032,ST3,26.56967737223373,1.0
298,032,ST6,24.632442596025637,1.0
299,032,ST6,18.746494089374586,1.0
300,032,TRA,25.860496983722,0.1
301,032,TRA,26.03094305542696,0.1
302,032,deglyc,3.846819783116053,0.1
303,032,deglyc,2.20528100694409,0.1
304,032,G0,29.09362676529841,0.1
305,032,G0,24.84535633756192,0.1
306,032,G2,25.85606089408489,0.1
307,032,G2,25.534212382338833,0.1
308,032,ST3,23.598963637892947,0.1
309,032,ST3,25.620094335271308,0.1
310,032,ST6,28.004186257978038,0.1
311,032,ST6,25.360443883667173,0.1
312,032,TRA,26.30766966797725,0.01
313,032,TRA,26.380076302597857,0.01
314,032,deglyc,0.6196666578707949,0.01
315,032,deglyc,1.2476053545767387,0.01
316,032,G0,21.08720885106917,0.01
317,032,G0,25.02174194350903,0.01
318,032,G2,20.71593227780179,0.01
319,032,G2,24.374574004694143,0.01
320,032,ST3,20.07509365516369,0.01
321,032,ST3,20.97961047606388,0.01
322,032,ST6,19.73011808196229,0.01
323,032,ST6,23.029696402872663,0.01
324,032,TRA,13.147258037218421,0.001
325,032,TRA,8.943942459277148,0.001
326,032,deglyc,1.5594865854227076,0.001
327,032,deglyc,1.1314132159648385,0.001
328,032,G0,7.021482274496377,0.001
329,032,G0,10.805503857031448,0.001
330,032,G2,10.33993717767006,0.001
331,032,G2,7.816191956094962,0.001
332,032,ST3,6.461625489040988,0.001
333,032,ST3,4.920204986938132,0.001
334,032,ST6,9.511594883425351,0.001
335,032,ST6,8.388447519280824,0.001
336,032,TRA,6.213649934431563,0.0001
337,032,TRA,4.6448333306368275,0.0001
338,032,deglyc,2.5083086195603643,0.0001
339,032,deglyc,2.207229916617293,0.0001
340,032,G0,3.362599254025435,0.0001
341,032,G0,0.4955489532545361,0.0001
342,032,G2,2.7327116476462883,0.0001
343,032,G2,3.387675225153978,0.0001
344,032,ST3,2.0294151102431717,0.0001
345,032,ST3,2.827465779852958,0.0001
346,032,ST6,1.6037917986601835,0.0001
347,032,ST6,0.4209335543376291,0.0001
348,032,TRA,2.23509004442184,1e-05
349,032,TRA,0.8064835708306626,1e-05
350,032,deglyc,1.8947547323471117,1e-05
351,032,deglyc,1.8454751591818397,1e-05
352,032,G0,2.4005617561990102,1e-05
353,032,G0,2.339514480816496,1e-05
354,032,G2,-0.06432639324536256,1e-05
355,032,G2,1.5453059474195936,1e-05
356,032,ST3,0.33616526407556035,1e-05
357,032,ST3,0.167909395622386,1e-05
358,032,ST6,-0.3836320418940082,1e-05
359,032,ST6,1.193277177305647,1e-05
360,032,TRA,0.4524873299990066,1e-06
361,032,TRA,0.7468098127416428,1e-06
362,032,deglyc,-0.2527024339437936,1e-06
363,032,deglyc,0.4535453095358884,1e-06
364,032,G0,0.10205480971263577,1e-06
365,032,G0,1.19763902276472,1e-06
366,032,G2,0.7227918211499841,1e-06
367,032,G2,0.4988713802212358,1e-06
368,032,ST3,0.8006182807665491,1e-06
369,032,ST3,0.3890642409196369,1e-06
370,032,ST6,-0.4079655712422839,1e-06
371,032,ST6,0.016915298560435568,1e-06
372,032,TRA,1.643902215839149,1e-07
373,032,TRA,0.07128059792053787,1e-07
374,032,deglyc,0.6400838068281559,1e-07
375,032,deglyc,-0.11703975964437023,1e-07
376,032,G0,2.320303799752069,1e-07
377,032,G0,2.9026008880160528,1e-07
378,032,G2,0.4404783342031772,1e-07
379,032,G2,0.8394665469190596,1e-07
380,032,ST3,0.15981678021746493,1e-07
381,032,ST3,-1.4517087869871714,1e-07
382,032,ST6,-0.06863255557091487,1e-07
383,032,ST6,0.6349980806333241,1e-07
384,035,TRA,62.5401649402472,1.0
385,035,TRA,56.46363162860142,1.0
386,035,deglyc,22.554756396035394,1.0
387,035,deglyc,21.214092151316933,1.0
388,035,G0,59.653941080500886,1.0
389,035,G0,55.79220440461629,1.0
390,035,TRA,66.24212814501817,0.1
391,035,TRA,59.806605671568434,0.1
392,035,deglyc,20.766121342147887,0.1
393,035,deglyc,16.06538833247174,0.1
394,035,G0,70.90913573682569,0.1
395,035,G0,57.402430698705466,0.1
396,035,TRA,54.76132399271453,0.01
397,035,TRA,63.29374334721895,0.01
398,035,deglyc,18.117571657309785,0.01
399,035,deglyc,13.60269038627916,0.01
400,035,G0,53.344206805673,0.01
401,035,G0,54.963973476638614,0.01
402,035,TRA,36.304741044504844,0.001
403,035,TRA,36.5001517210713,0.001
404,035,deglyc,15.371390878366475,0.001
405,035,deglyc,13.63162705466509,0.001
406,035,G0,38.31642417022928,0.001
407,035,G0,37.897928299736854,0.001
408,035,TRA,18.57812685465436,0.0001
409,035,TRA,18.40597316685479,0.0001
410,035,deglyc,18.57808973256536,0.0001
411,035,deglyc,17.549548012271448,0.0001
412,035,G0,23.126269517441003,0.0001
413,035,G0,22.876660590914973,0.0001
414,035,TRA,13.984788048493948,1e-05
415,035,TRA,14.254312975775635,1e-05
416,035,deglyc,18.151519807712525,1e-05
417,035,deglyc,20.761740935644312,1e-05
418,035,G0,23.225292689884206,1e-05
419,035,G0,18.94385367561425,1e-05
420,035,TRA,13.877839310046378,1e-06
421,035,TRA,18.130415900108414,1e-06
422,035,deglyc,17.396456517180244,1e-06
423,035,deglyc,16.552764239128493,1e-06
424,035,G0,17.72147896753695,1e-06
425,035,G0,17.387788509395616,1e-06
426,035,TRA,16.85200539866541,1e-07
427,035,TRA,15.526115745374264,1e-07
428,035,deglyc,14.478901614306631,1e-07
429,035,deglyc,15.625417333485078,1e-07
430,035,G0,15.827324375628894,1e-07
431,035,G0,15.928574873412902,1e-07
432,037,TRA,68.39344600856647,1.0
433,037,TRA,59.65769041149124,1.0
434,037,deglyc,22.253269350113182,1.0
435,037,deglyc,19.556609437913725,1.0
436,037,G0,65.98979074494969,1.0
437,037,G0,60.48993052508235,1.0
438,037,G2,56.606700159659006,1.0
439,037,G2,47.54334212704063,1.0
440,037,ST3,51.502301554051286,1.0
441,037,ST3,60.1264867125968,1.0
442,037,TRA,59.71747553584729,0.1
443,037,TRA,59.33177703099822,0.1
444,037,deglyc,11.400997847939696,0.1
445,037,deglyc,9.550591637933909,0.1
446,037,G0,59.635083059282096,0.1
447,037,G0,54.23454298857008,0.1
448,037,G2,58.77837948903115,0.1
449,037,G2,55.955708645675756,0.1
450,037,ST3,58.30826535376561,0.1
451,037,ST3,48.24415148447986,0.1
452,037,TRA,65.76082169991511,0.01
453,037,TRA,53.597490819011355,0.01
454,037,deglyc,1.8876458523010475,0.01
455,037,deglyc,4.397284680051056,0.01
456,037,G0,58.39288515567164,0.01
457,037,G0,61.61365328160658,0.01
458,037,G2,59.757604514070756,0.01
459,037,G2,55.581926331399956,0.01
460,037,ST3,49.75490914105765,0.01
461,037,ST3,47.6223008103721,0.01
462,037,TRA,48.41363238187047,0.001
463,037,TRA,38.91566749212787,0.001
464,037,deglyc,4.567749312800529,0.001
465,037,deglyc,4.410555826873344,0.001
466,037,G0,37.822997363063344,0.001
467,037,G0,36.559955406471865,0.001
468,037,G2,41.98132096912038,0.001
469,037,G2,36.386353957200754,0.001
470,037,ST3,28.212125639586525,0.001
471,037,ST3,29.892160022065372,0.001
472,037,TRA,19.03337359327004,0.0001
473,037,TRA,14.050679756492707,0.0001
474,037,deglyc,3.939940543406133,0.0001
475,037,deglyc,3.1463630855224576,0.0001
476,037,G0,12.193016178084807,0.0001
477,037,G0,13.811483575934949,0.0001
478,037,G2,16.79882800615373,0.0001
479,037,G2,13.716506711194198,0.0001
480,037,ST3,7.309271269572662,0.0001
481,037,ST3,8.791908943722818,0.0001
482,037,TRA,5.5997433873726825,1e-05
483,037,TRA,6.0164945196814665,1e-05
484,037,deglyc,3.0150622566821075,1e-05
485,037,deglyc,4.254457442572052,1e-05
486,037,G0,2.4119396764816146,1e-05
487,037,G0,4.77661674663435,1e-05
488,037,G2,6.551776482209996,1e-05
489,037,G2,3.9921156395144464,1e-05
490,037,ST3,3.5649146391483946,1e-05
491,037,ST3,3.2645041338075607,1e-05
492,037,TRA,1.9616672977937395,1e-06
493,037,TRA,2.6454004942868035,1e-06
494,037,deglyc,4.395929723802069,1e-06
495,037,deglyc,2.488838083872845,1e-06
496,037,G0,2.6359158005438807,1e-06
497,037,G0,3.5761440710749417,1e-06
498,037,G2,2.633410059535478,1e-06
499,037,G2,0.9690040765312716,1e-06
500,037,ST3,0.4225483652097112,1e-06
501,037,ST3,2.6201574737577005,1e-06
502,037,TRA,2.6655021054875534,1e-07
503,037,TRA,1.5885903032092044,1e-07
504,037,deglyc,2.121347963684822,1e-07
505,037,deglyc,1.128239277354193,1e-07
506,037,G0,-0.02570085962693544,1e-07
507,037,G0,1.9539830253679689,1e-07
508,037,G2,0.4128223778882039,1e-07
509,037,G2,-0.5261623026609061,1e-07
510,037,ST3,2.2465236478379627,1e-07
511,037,ST3,-0.2390971883203884,1e-07
0,017,TRA,61.301662000640576,1.0
1,017,TRA,57.88561107985594,1.0
2,017,deglyc,10.15474796430432,1.0
3,017,deglyc,9.470210938494724,1.0
4,017,G0,56.09625588950321,1.0
5,017,G0,61.4818171622316,1.0
6,017,G2,58.27816203709836,1.0
7,017,G2,59.023074403353604,1.0
8,017,ST3,60.983826791339894,1.0
9,017,ST3,57.63130650517493,1.0
10,017,ST6,49.011932776457634,1.0
11,017,ST6,52.48759044038906,1.0
12,017,TRA,59.882224599704934,0.1
13,017,TRA,53.7665161193563,0.1
14,017,deglyc,3.216822410436422,0.1
15,017,deglyc,3.617989747923348,0.1
16,017,G0,54.537965318665,0.1
17,017,G0,49.517710251560885,0.1
18,017,G2,59.168905627679536,0.1
19,017,G2,55.10450243286327,0.1
20,017,ST3,52.7367575489149,0.1
21,017,ST3,53.13159407180903,0.1
22,017,ST6,52.36125731595913,0.1
23,017,ST6,51.47951440427187,0.1
24,017,TRA,56.42820901760827,0.01
25,017,TRA,47.34425867425258,0.01
26,017,deglyc,4.383209263862791,0.01
27,017,deglyc,2.43776814311848,0.01
28,017,G0,50.50774447740086,0.01
29,017,G0,57.83482297940069,0.01
30,017,G2,58.113581083930534,0.01
31,017,G2,55.58509823330832,0.01
32,017,ST3,51.7349921011458,0.01
33,017,ST3,50.182425557559206,0.01
34,017,ST6,48.6212426337281,0.01
35,017,ST6,43.969287256464646,0.01
36,017,TRA,40.133137233148844,0.001
37,017,TRA,30.39242049796408,0.001
38,017,deglyc,3.1397199656194297,0.001
39,017,deglyc,1.1569816496383625,0.001
40,017,G0,24.99670565039361,0.001
41,017,G0,19.855113341301802,0.001
42,017,G2,31.091682229919208,0.001
43,017,G2,27.770553075537034,0.001
44,017,ST3,16.997205643162722,0.001
45,017,ST3,18.49999539852933,0.001
46,017,ST6,29.29203188101143,0.001
47,017,ST6,28.43654263495179,0.001
48,017,TRA,8.021384804002128,0.0001
49,017,TRA,5.3334786926119495,0.0001
50,017,deglyc,4.081373014124089,0.0001
51,017,deglyc,2.096854788608942,0.0001
52,017,G0,3.5276188865796136,0.0001
53,017,G0,3.7270698856195774,0.0001
54,017,G2,5.847650059267955,0.0001
55,017,G2,6.853966412095778,0.0001
56,017,ST3,2.808677018526129,0.0001
57,017,ST3,3.3179131814740135,0.0001
58,017,ST6,6.2159497491086055,0.0001
59,017,ST6,9.975320947522707,0.0001
60,017,TRA,3.4594564419224123,1e-05
61,017,TRA,3.9360272196710753,1e-05
62,017,deglyc,4.631061666482776,1e-05
63,017,deglyc,1.6249764996319336,1e-05
64,017,G0,1.0982446350138748,1e-05
65,017,G0,4.490529718269649,1e-05
66,017,G2,2.0593351046804234,1e-05
67,017,G2,3.2735570268350713,1e-05
68,017,ST3,-0.7639048100335909,1e-05
69,017,ST3,0.6905037679976921,1e-05
70,017,ST6,0.5847002819437384,1e-05
71,017,ST6,0.8588670289254507,1e-05
72,017,TRA,2.437626559405543,1e-06
73,017,TRA,2.7752025835386878,1e-06
74,017,deglyc,3.290203226227613,1e-06
75,017,deglyc,4.1110853675963215,1e-06
76,017,G0,1.6652469528403868,1e-06
77,017,G0,2.6853171520678862,1e-06
78,017,G2,0.988517257487074,1e-06
79,017,G2,2.747512854536996,1e-06
80,017,ST3,3.5797419191854325,1e-06
81,017,ST3,3.512691917987026,1e-06
82,017,ST6,3.9396679437180464,1e-06
83,017,ST6,1.6496727444172286,1e-06
84,017,TRA,4.142759666804981,1e-07
85,017,TRA,5.410338422492473,1e-07
86,017,deglyc,1.9883207595197616,1e-07
87,017,deglyc,3.6706386628915055,1e-07
88,017,G0,2.7694583300423563,1e-07
89,017,G0,0.9254113740062224,1e-07
90,017,G2,2.6382102281490054,1e-07
91,017,G2,2.846682132327578,1e-07
92,017,ST3,2.766930049454181,1e-07
93,017,ST3,2.758192311741448,1e-07
94,017,ST6,0.5863588340095811,1e-07
95,017,ST6,3.534293547332397,1e-07
96,020,TRA,51.57987703050006,1.0
97,020,TRA,48.540297202417065,1.0
98,020,deglyc,6.858436412175676,1.0
99,020,deglyc,9.30342532465398,1.0
100,020,G0,51.67706413630952,1.0
101,020,G0,46.316441823302924,1.0
102,020,G2,51.82075137869669,1.0
103,020,G2,49.25644784870122,1.0
104,020,ST3,40.69811692650481,1.0
105,020,ST3,40.856913173686905,1.0
106,020,ST6,51.49189286603158,1.0
107,020,ST6,42.3873522055658,1.0
108,020,TRA,52.31572803912727,0.1
109,020,TRA,51.65685811784881,0.1
110,020,deglyc,5.320857515915781,0.1
111,020,deglyc,3.1402660742264765,0.1
112,020,G0,54.396705225642464,0.1
113,020,G0,55.941039687633975,0.1
114,020,G2,53.46765312758927,0.1
115,020,G2,50.06080514814561,0.1
116,020,ST3,49.51451450489744,0.1
117,020,ST3,57.51170872023191,0.1
118,020,ST6,54.15368689550708,0.1
119,020,ST6,54.44799898221539,0.1
120,020,TRA,45.298414474790675,0.01
121,020,TRA,55.12331284043931,0.01
122,020,deglyc,2.7479173794311027,0.01
123,020,deglyc,3.4154036809540487,0.01
124,020,G0,50.10855931189508,0.01
125,020,G0,48.377637742496255,0.01
126,020,G2,46.12370593750516,0.01
127,020,G2,48.522538559565724,0.01
128,020,ST3,43.891355535614736,0.01
129,020,ST3,45.09878143954836,0.01
130,020,ST6,43.25940674603917,0.01
131,020,ST6,48.787320329004146,0.01
132,020,TRA,31.464087847435064,0.001
133,020,TRA,31.188565942058077,0.001
134,020,deglyc,4.309343018198668,0.001
135,020,deglyc,2.9219439888763734,0.001
136,020,G0,22.52329886410421,0.001
137,020,G0,23.815695222045235,0.001
138,020,G2,31.946281521211823,0.001
139,020,G2,33.32785539205896,0.001
140,020,ST3,23.21734222492535,0.001
141,020,ST3,19.898700898641934,0.001
142,020,ST6,33.737052548693924,0.001
143,020,ST6,31.389554135695647,0.001
144,020,TRA,12.254191712235556,0.0001
145,020,TRA,6.382189254342296,0.0001
146,020,deglyc,2.5281996831963287,0.0001
147,020,deglyc,1.8439458248126075,0.0001
148,020,G0,6.849435733281768,0.0001
149,020,G0,4.38373514622513,0.0001
150,020,G2,6.576260072290619,0.0001
151,020,G2,5.503035301977331,0.0001
152,020,ST3,3.5189216013562903,0.0001
153,020,ST3,3.787242963618144,0.0001
154,020,ST6,9.661975964546633,0.0001
155,020,ST6,10.41801276538982,0.0001
156,020,TRA,3.5983905168038133,1e-05
157,020,TRA,2.6969067902840824,1e-05
158,020,deglyc,3.274184040420937,1e-05
159,020,deglyc,1.0969501553527297,1e-05
160,020,G0,3.540442325722841,1e-05
161,020,G0,0.7979658061174907,1e-05
162,020,G2,3.178392545496157,1e-05
163,020,G2,3.906496902401189,1e-05
164,020,ST3,-0.874724404774485,1e-05
165,020,ST3,0.9417744059728936,1e-05
166,020,ST6,1.2301399767377974,1e-05
167,020,ST6,2.9828452116843387,1e-05
168,020,TRA,-0.10570235483042438,1e-06
169,020,TRA,2.655746382308592,1e-06
170,020,deglyc,3.2159931344034987,1e-06
171,020,deglyc,0.9681696553134412,1e-06
172,020,G0,2.852790458228609,1e-06
173,020,G0,2.1801666905504926,1e-06
174,020,G2,-0.13248190282037928,1e-06
175,020,G2,0.1681609984807072,1e-06
176,020,ST3,-0.995293049463382,1e-06
177,020,ST3,2.284453208251538,1e-06
178,020,ST6,2.388476784771417,1e-06
179,020,ST6,1.0893855398329093,1e-06
180,020,TRA,4.4268574999370465,1e-07
181,020,TRA,3.2165594692552504,1e-07
182,020,deglyc,3.4055737260272227,1e-07
183,020,deglyc,3.285975941084186,1e-07
184,020,G0,3.723833686466712,1e-07
185,020,G0,1.7356342844151835,1e-07
186,020,G2,3.292953995507549,1e-07
187,020,G2,0.7321091533567026,1e-07
188,020,ST3,2.147622662819499,1e-07
189,020,ST3,1.830616729551748,1e-07
190,020,ST6,2.436615247170272,1e-07
191,020,ST6,1.031012597613122,1e-07
192,021,TRA,47.88830420433847,1.0
193,021,TRA,43.118712987868406,1.0
194,021,deglyc,8.532036804079393,1.0
195,021,deglyc,9.899148909962165,1.0
196,021,G0,48.75708209316957,1.0
197,021,G0,40.13453284403351,1.0
198,021,G2,45.82002909949827,1.0
199,021,G2,39.12295766758228,1.0
200,021,ST3,43.57343942133523,1.0
201,021,ST3,42.743556601072605,1.0
202,021,ST6,44.04881685064628,1.0
203,021,ST6,40.202675062446,1.0
204,021,TRA,46.44910576232565,0.1
205,021,TRA,40.80032014100121,0.1
206,021,deglyc,4.1036825620341455,0.1
207,021,deglyc,3.5490991584567504,0.1
208,021,G0,47.025068306556655,0.1
209,021,G0,40.56761719566556,0.1
210,021,G2,46.69847513329854,0.1
211,021,G2,42.94505045082782,0.1
212,021,ST3,41.73881789533181,0.1
213,021,ST3,42.35634537243242,0.1
214,021,ST6,37.350754332739726,0.1
215,021,ST6,40.33386248560524,0.1
216,021,TRA,41.399037210525776,0.01
217,021,TRA,35.32776578979491,0.01
218,021,deglyc,1.6531314322618529,0.01
219,021,deglyc,4.64477506039304,0.01
220,021,G0,36.306554223578686,0.01
221,021,G0,38.531259104970474,0.01
222,021,G2,37.13900577691889,0.01
223,021,G2,43.00336271431349,0.01
224,021,ST3,34.49432315046415,0.01
225,021,ST3,32.61787375040997,0.01
226,021,ST6,41.66157386680189,0.01
227,021,ST6,40.383841536272286,0.01
228,021,TRA,26.71356997972218,0.001
229,021,TRA,22.78227570131217,0.001
230,021,deglyc,1.5074417916488487,0.001
231,021,deglyc,3.690703097639264,0.001
232,021,G0,15.727098606887052,0.001
233,021,G0,15.628839510108223,0.001
234,021,G2,20.038787869471548,0.001
235,021,G2,21.980932112328876,0.001
236,021,ST3,12.978291272688914,0.001
237,021,ST3,12.2689568708705,0.001
238,021,ST6,23.754207438140806,0.001
239,021,ST6,20.92247250065052,0.001
240,021,TRA,6.118418797139161,0.0001
241,021,TRA,3.0371122262289303,0.0001
242,021,deglyc,3.0526864346520908,0.0001
243,021,deglyc,2.7592036239767195,0.0001
244,021,G0,4.748616600710569,0.0001
245,021,G0,5.147599503769314,0.0001
246,021,G2,6.104402009558318,0.0001
247,021,G2,5.9629801065781525,0.0001
248,021,ST3,4.4024039700882165,0.0001
249,021,ST3,3.3678315534069445,0.0001
250,021,ST6,8.131698742625387,0.0001
251,021,ST6,6.7439963196325134,0.0001
252,021,TRA,1.8370284491233608,1e-05
253,021,TRA,3.4391088397487786,1e-05
254,021,deglyc,1.5982171778866885,1e-05
255,021,deglyc,3.4089110564036162,1e-05
256,021,G0,3.26348435697178,1e-05
257,021,G0,2.201768319895861,1e-05
258,021,G2,2.302191624858178,1e-05
259,021,G2,4.361344693336252,1e-05
260,021,ST3,1.5438288058738627,1e-05
261,021,ST3,1.0700290236498404,1e-05
262,021,ST6,-0.2682606835277346,1e-05
263,021,ST6,2.1417772780996405,1e-05
264,021,TRA,2.5176011309707014,1e-06
265,021,TRA,2.485502080623227,1e-06
266,021,deglyc,1.872990712209564,1e-06
267,021,deglyc,2.045419448323109,1e-06
268,021,G0,1.830030168455289,1e-06
269,021,G0,1.0956556756915825,1e-06
270,021,G2,0.9233685232909769,1e-06
271,021,G2,4.4307813914098935,1e-06
272,021,ST3,1.4887931940304682,1e-06
273,021,ST3,1.3856595722776266,1e-06
274,021,ST6,0.9291532292767204,1e-06
275,021,ST6,2.632465974652673,1e-06
276,021,TRA,4.154672924936461,1e-07
277,021,TRA,2.1812386815198788,1e-07
278,021,deglyc,-0.9001892468585854,1e-07
279,021,deglyc,2.4236097718246983,1e-07
280,021,G0,0.28385511819560266,1e-07
281,021,G0,2.318473751846025,1e-07
282,021,G2,2.274340085898837,1e-07
283,021,G2,2.575812263232844,1e-07
284,021,ST3,1.550503466626646,1e-07
285,021,ST3,2.0942253767972403,1e-07
286,021,ST6,-1.460071926548797,1e-07
287,021,ST6,0.8675440879040696,1e-07
288,023,TRA,58.10814022410479,1.0
289,023,TRA,59.43006689931569,1.0
290,023,deglyc,17.703829728190623,1.0
291,023,deglyc,18.575317933812247,1.0
292,023,G0,58.384430726780565,1.0
293,023,G0,60.2831694485001,1.0
294,023,G2,63.63075453095693,1.0
295,023,G2,62.376403739306774,1.0
296,023,ST3,59.75059219916217,1.0
297,023,ST3,54.77089075269239,1.0
298,023,ST6,52.70049189215812,1.0
299,023,ST6,57.875760898684405,1.0
300,023,TRA,61.91459812019304,0.1
301,023,TRA,55.51634922755468,0.1
302,023,deglyc,8.522085491684335,0.1
303,023,deglyc,7.741089504874678,0.1
304,023,G0,59.83972925957889,0.1
305,023,G0,59.45478337034568,0.1
306,023,G2,59.103271463610525,0.1
307,023,G2,58.648443898920156,0.1
308,023,ST3,55.65328090421024,0.1
309,023,ST3,49.626851067991225,0.1
310,023,ST6,50.93581272034599,0.1
311,023,ST6,55.03888849503896,0.1
312,023,TRA,56.5421232277891,0.01
313,023,TRA,51.23908503345878,0.01
314,023,deglyc,6.332756312282297,0.01
315,023,deglyc,7.329809045035049,0.01
316,023,G0,50.52378388945224,0.01
317,023,G0,50.184144788359156,0.01
318,023,G2,57.67709872318795,0.01
319,023,G2,53.663645438784606,0.01
320,023,ST3,45.72539050052169,0.01
321,023,ST3,46.06784104962883,0.01
322,023,ST6,50.28976623821075,0.01
323,023,ST6,48.51424579923653,0.01
324,023,TRA,41.48129734774266,0.001
325,023,TRA,32.185436638608486,0.001
326,023,deglyc,5.8632040414464095,0.001
327,023,deglyc,6.5027781252759,0.001
328,023,G0,27.118438719990195,0.001
329,023,G0,27.299301800145887,0.001
330,023,G2,32.5633437946842,0.001
331,023,G2,31.85477799016459,0.001
332,023,ST3,23.72053074070631,0.001
333,023,ST3,27.57668452003577,0.001
334,023,ST6,31.48496133197103,0.001
335,023,ST6,33.835797075345695,0.001
336,023,TRA,17.922354075987773,0.0001
337,023,TRA,15.818015576837833,0.0001
338,023,deglyc,5.523989691492123,0.0001
339,023,deglyc,5.396705933561036,0.0001
340,023,G0,11.399956493347645,0.0001
341,023,G0,12.656147873265992,0.0001
342,023,G2,15.66890770086962,0.0001
343,023,G2,14.72407913194621,0.0001
344,023,ST3,10.547501183993797,0.0001
345,023,ST3,8.192802227880405,0.0001
346,023,ST6,11.620725954307096,0.0001
347,023,ST6,12.260522526828346,0.0001
348,023,TRA,11.033214224349306,1e-05
349,023,TRA,8.063617202947002,1e-05
350,023,deglyc,5.7274252607390475,1e-05
351,023,deglyc,5.283722130636662,1e-05
352,023,G0,6.423329436073084,1e-05
353,023,G0,8.604669248816485,1e-05
354,023,G2,5.836181778519991,1e-05
355,023,G2,4.504971256989307,1e-05
356,023,ST3,2.1625900839014958,1e-05
357,023,ST3,3.4902610126087383,1e-05
358,023,ST6,5.002395293029241,1e-05
359,023,ST6,4.3173323848573,1e-05
360,023,TRA,5.634789059988309,1e-06
361,023,TRA,5.653619693809043,1e-06
362,023,deglyc,5.533920777642474,1e-06
363,023,deglyc,2.6568385995226804,1e-06
364,023,G0,3.567424136159845,1e-06
365,023,G0,5.623603946666224,1e-06
366,023,G2,3.9746188945689807,1e-06
367,023,G2,4.37995283846522,1e-06
368,023,ST3,4.552300669599946,1e-06
369,023,ST3,3.938191427854555,1e-06
370,023,ST6,2.4738315374282105,1e-06
371,023,ST6,1.8126962767427608,1e-06
372,023,TRA,6.404336992294711,1e-07
373,023,TRA,7.1527889513733784,1e-07
374,023,deglyc,4.673415422895888,1e-07
375,023,deglyc,5.939497436475182,1e-07
376,023,G0,4.4951008495730695,1e-07
377,023,G0,4.113229349535095,1e-07
378,023,G2,3.3080023215683667,1e-07
379,023,G2,5.047884117371685,1e-07
380,023,ST3,2.7063726728062067,1e-07
381,023,ST3,4.785428366074398,1e-07
382,023,ST6,5.6210149873439335,1e-07
383,023,ST6,6.095057484504423,1e-07
384,029,TRA,54.46339115443617,1.0
385,029,TRA,51.757240970321725,1.0
386,029,deglyc,14.791655015506954,1.0
387,029,deglyc,11.4675930556425,1.0
388,029,G0,53.88330245628528,1.0
389,029,G0,53.245912806883965,1.0
390,029,G2,49.05990942889883,1.0
391,029,G2,49.07554431605612,1.0
392,029,ST3,46.1467638564693,1.0
393,029,ST3,47.06703776432036,1.0
394,029,ST6,46.863056086466386,1.0
395,029,ST6,46.0156168857995,1.0
396,029,TRA,54.49530816858129,0.1
397,029,TRA,47.973476920792926,0.1
398,029,deglyc,7.9039916797319805,0.1
399,029,deglyc,6.980946776356286,0.1
400,029,G0,44.77251188620554,0.1
401,029,G0,44.99795360969193,0.1
402,029,G2,44.79004804036511,0.1
403,029,G2,44.7749794880596,0.1
404,029,ST3,42.61338049014866,0.1
405,029,ST3,45.0577423890411,0.1
406,029,ST6,47.165114824896854,0.1
407,029,ST6,43.75670942461088,0.1
408,029,TRA,52.082135139024594,0.01
409,029,TRA,45.22505388524417,0.01
410,029,deglyc,4.966473482432447,0.01
411,029,deglyc,0.6678908264170547,0.01
412,029,G0,49.94031740843555,0.01
413,029,G0,51.32104177700504,0.01
414,029,G2,53.576288287902,0.01
415,029,G2,48.45658077558143,0.01
416,029,ST3,43.010360994981575,0.01
417,029,ST3,41.2650383393525,0.01
418,029,ST6,36.0961203736637,0.01
419,029,ST6,42.706259405835866,0.01
420,029,TRA,35.453289864436634,0.001
421,029,TRA,26.824551384420715,0.001
422,029,deglyc,1.763222882193349,0.001
423,029,deglyc,1.5846251414446582,0.001
424,029,G0,30.411473620476567,0.001
425,029,G0,26.608251923541154,0.001
426,029,G2,27.574661895565228,0.001
427,029,G2,26.73674925615457,0.001
428,029,ST3,20.16376583550622,0.001
429,029,ST3,21.18401807093607,0.001
430,029,ST6,26.88037581980762,0.001
431,029,ST6,21.94770039227791,0.001
432,029,TRA,16.913893741221177,0.0001
433,029,TRA,13.999676177822266,0.0001
434,029,deglyc,2.334755878833875,0.0001
435,029,deglyc,4.917910268894778,0.0001
436,029,G0,10.294228147792767,0.0001
437,029,G0,8.439946711935702,0.0001
438,029,G2,10.919866349020236,0.0001
439,029,G2,8.002877790096685,0.0001
440,029,ST3,4.950069997976363,0.0001
441,029,ST3,5.89793250360558,0.0001
442,029,ST6,11.973997544331631,0.0001
443,029,ST6,10.379643579183677,0.0001
444,029,TRA,3.440261735696987,1e-05
445,029,TRA,5.770163315801562,1e-05
446,029,deglyc,3.710585496184674,1e-05
447,029,deglyc,0.3794443506733264,1e-05
448,029,G0,3.24228725252052,1e-05
449,029,G0,2.8587167479272924,1e-05
450,029,G2,3.402762278013172,1e-05
451,029,G2,3.4622881161811674,1e-05
452,029,ST3,2.014594651392076,1e-05
453,029,ST3,1.7038184014935882,1e-05
454,029,ST6,2.9836744877172587,1e-05
455,029,ST6,1.5957091235432181,1e-05
456,029,TRA,2.000921709971228,1e-06
457,029,TRA,2.250675379593519,1e-06
458,029,deglyc,1.5977519742584636,1e-06
459,029,deglyc,1.9996272303100808,1e-06
460,029,G0,3.4321712378148272,1e-06
461,029,G0,0.7655229096100241,1e-06
462,029,G2,-0.16375167713492594,1e-06
463,029,G2,2.187448138644437,1e-06
464,029,ST3,-0.4394758449589564,1e-06
465,029,ST3,0.7461259409375453,1e-06
466,029,ST6,1.07395291512269,1e-06
467,029,ST6,-0.16749353240542636,1e-06
468,029,TRA,3.116035033069406,1e-07
469,029,TRA,4.369172250037241,1e-07
470,029,deglyc,0.10196049955992856,1e-07
471,029,deglyc,1.7565279951958634,1e-07
472,029,G0,0.7696490635299295,1e-07
473,029,G0,-0.13765982146495911,1e-07
474,029,G2,2.126081712208248,1e-07
475,029,G2,0.4547062072221244,1e-07
476,029,ST3,0.2455466107235704,1e-07
477,029,ST3,0.05859543091154828,1e-07
478,029,ST6,1.46731292215333,1e-07
479,029,ST6,0.3903462965695397,1e-07
480,034,TRA,72.17128635781259,1.0
481,034,TRA,72.38477437067809,1.0
482,034,deglyc,32.50946107878901,1.0
483,034,deglyc,33.99301567544078,1.0
484,034,G0,65.85303226298407,1.0
485,034,G0,71.12126109017639,1.0
486,034,G2,66.96679042768697,1.0
487,034,G2,62.27015527586929,1.0
488,034,ST3,73.94565390083861,1.0
489,034,ST3,74.27159983426614,1.0
490,034,ST6,69.59072092707396,1.0
491,034,ST6,75.60550044634266,1.0
492,034,TRA,66.33482141186673,0.1
493,034,TRA,58.403140003133046,0.1
494,034,deglyc,21.41562879905762,0.1
495,034,deglyc,24.8240341993436,0.1
496,034,G0,64.43054069909789,0.1
497,034,G0,71.6582881133495,0.1
498,034,G2,69.94927156696662,0.1
499,034,G2,72.27595717416304,0.1
500,034,ST3,75.28070740886332,0.1
501,034,ST3,63.39121511491086,0.1
502,034,ST6,67.01547499869288,0.1
503,034,ST6,61.65473132821804,0.1
504,034,TRA,60.14366903876694,0.01
505,034,TRA,50.80935823844781,0.01
506,034,deglyc,11.903650665246243,0.01
507,034,deglyc,19.101139617418557,0.01
508,034,G0,63.5006795512565,0.01
509,034,G0,62.66834935538454,0.01
510,034,G2,66.57280340707045,0.01
511,034,G2,66.02182027505064,0.01
512,034,ST3,58.41835013915153,0.01
513,034,ST3,69.19068625929054,0.01
514,034,ST6,66.00011751448174,0.01
515,034,ST6,64.72103002555687,0.01
516,034,TRA,59.98030166028141,0.001
517,034,TRA,50.798314708838674,0.001
518,034,deglyc,11.603857266222795,0.001
519,034,deglyc,13.259597884051635,0.001
520,034,G0,47.67412849915298,0.001
521,034,G0,51.84562965968434,0.001
522,034,G2,57.5831680427761,0.001
523,034,G2,57.94001967811347,0.001
524,034,ST3,47.47489998880478,0.001
525,034,ST3,50.178400534862824,0.001
526,034,ST6,53.173421945859786,0.001
527,034,ST6,48.70386684334966,0.001
528,034,TRA,33.27263774401321,0.0001
529,034,TRA,29.553880844967555,0.0001
530,034,deglyc,16.5088025122614,0.0001
531,034,deglyc,17.602192848545986,0.0001
532,034,G0,18.923431831436904,0.0001
533,034,G0,25.716011590851803,0.0001
534,034,G2,27.422762797827662,0.0001
535,034,G2,31.95760821824685,0.0001
536,034,ST3,24.04125830299987,0.0001
537,034,ST3,26.051403180556754,0.0001
538,034,ST6,25.223704794722327,0.0001
539,034,ST6,31.19182236745565,0.0001
540,034,TRA,20.016640131519136,1e-05
541,034,TRA,15.128037691202488,1e-05
542,034,deglyc,11.086409247924507,1e-05
543,034,deglyc,14.616313700155834,1e-05
544,034,G0,13.736775449141465,1e-05
545,034,G0,15.134975293136435,1e-05
546,034,G2,12.845384618729724,1e-05
547,034,G2,16.374803641088118,1e-05
548,034,ST3,13.64207617143077,1e-05
549,034,ST3,14.207521068414971,1e-05
550,034,ST6,14.336422925922493,1e-05
551,034,ST6,19.206255411152533,1e-05
552,034,TRA,13.762503232406736,1e-06
553,034,TRA,16.17276368272587,1e-06
554,034,deglyc,20.14540040531372,1e-06
555,034,deglyc,18.683285628049678,1e-06
556,034,G0,15.692673538398465,1e-06
557,034,G0,10.721669377152011,1e-06
558,034,G2,12.66725208160926,1e-06
559,034,G2,13.623245537610046,1e-06
560,034,ST3,10.107074705533693,1e-06
561,034,ST3,11.80458251867919,1e-06
562,034,ST6,9.08212998133219,1e-06
563,034,ST6,13.38997625742265,1e-06
564,034,TRA,15.170978008712051,1e-07
565,034,TRA,12.92228480109966,1e-07
566,034,deglyc,13.874516175585244,1e-07
567,034,deglyc,16.573324232871634,1e-07
568,034,G0,10.13104280550959,1e-07
569,034,G0,13.448773950781256,1e-07
570,034,G2,12.279231803180846,1e-07
571,034,G2,11.610127402081465,1e-07
572,034,ST3,11.493442196376007,1e-07
573,034,ST3,10.408769371559453,1e-07
574,034,ST6,10.542889600200967,1e-07
575,034,ST6,11.662189755953168,1e-07
576,042,TRA,62.116213327416474,1.0
577,042,TRA,58.7707722268984,1.0
578,042,deglyc,22.93490294385913,1.0
579,042,deglyc,24.568920574874372,1.0
580,042,G0,50.16228021783261,1.0
581,042,G0,53.85336761412128,1.0
582,042,G2,53.862064899344595,1.0
583,042,G2,59.09815422370005,1.0
584,042,ST3,58.237163439080504,1.0
585,042,ST3,63.52756023046998,1.0
586,042,ST6,56.87713051884465,1.0
587,042,ST6,58.47300145234551,1.0
588,042,TRA,56.80039214643235,0.1
589,042,TRA,59.05533526365871,0.1
590,042,deglyc,18.81105481585369,0.1
591,042,deglyc,13.914442782633705,0.1
592,042,G0,63.726161727232295,0.1
593,042,G0,60.96752443810735,0.1
594,042,G2,59.22019938425243,0.1
595,042,G2,60.52598551618844,0.1
596,042,ST3,66.26902543784006,0.1
597,042,ST3,63.28411714919576,0.1
598,042,ST6,59.97101781396163,0.1
599,042,ST6,53.54505896607685,0.1
600,042,TRA,54.76061582038205,0.01
601,042,TRA,55.320458047582854,0.01
602,042,deglyc,8.706427485929362,0.01
603,042,deglyc,5.9588741789029545,0.01
604,042,G0,54.98753405973194,0.01
605,042,G0,55.13882637012834,0.01
606,042,G2,53.145550180655775,0.01
607,042,G2,53.86704055554215,0.01
608,042,ST3,57.974444746602074,0.01
609,042,ST3,49.060172370080004,0.01
610,042,ST6,52.19352106861725,0.01
611,042,ST6,45.41659642260433,0.01
612,042,TRA,57.752866235854405,0.001
613,042,TRA,50.854017786757325,0.001
614,042,deglyc,4.980105971363884,0.001
615,042,deglyc,6.643734824627843,0.001
616,042,G0,41.02171661554653,0.001
617,042,G0,46.693459024611606,0.001
618,042,G2,47.21982681682496,0.001
619,042,G2,45.548754705509424,0.001
620,042,ST3,40.527549004904174,0.001
621,042,ST3,38.69096553316432,0.001
622,042,ST6,50.004758224066954,0.001
623,042,ST6,46.73453852760826,0.001
624,042,TRA,26.80784450629405,0.0001
625,042,TRA,19.34421862628807,0.0001
626,042,deglyc,8.33404209465822,0.0001
627,042,deglyc,7.6086278282990065,0.0001
628,042,G0,13.615943863271394,0.0001
629,042,G0,12.242966146424054,0.0001
630,042,G2,14.981478322067149,0.0001
631,042,G2,19.362341341544113,0.0001
632,042,ST3,13.352193632312966,0.0001
633,042,ST3,14.232763421807313,0.0001
634,042,ST6,20.415218509683765,0.0001
635,042,ST6,21.73550685907355,0.0001
636,042,TRA,10.095525519806905,1e-05
637,042,TRA,9.017223962072558,1e-05
638,042,deglyc,5.59557037150454,1e-05
639,042,deglyc,5.867936982707472,1e-05
640,042,G0,4.8678907657383235,1e-05
641,042,G0,6.460505273841612,1e-05
642,042,G2,9.05239740161525,1e-05
643,042,G2,6.536475048955097,1e-05
644,042,ST3,6.767519442224895,1e-05
645,042,ST3,5.258904528383137,1e-05
646,042,ST6,5.862860195286416,1e-05
647,042,ST6,7.534215474027837,1e-05
648,042,TRA,5.774066981029705,1e-06
649,042,TRA,4.211913197452748,1e-06
650,042,deglyc,3.580571195218355,1e-06
651,042,deglyc,5.949812821274937,1e-06
652,042,G0,4.683973522632106,1e-06
653,042,G0,5.785292546841204,1e-06
654,042,G2,5.488270143342387,1e-06
655,042,G2,6.389490928680947,1e-06
656,042,ST3,2.993625800112317,1e-06
657,042,ST3,2.7042691433568478,1e-06
658,042,ST6,7.4310211735408735,1e-06
659,042,ST6,7.222933568011711,1e-06
660,042,TRA,7.865521362302307,1e-07
661,042,TRA,7.345545063415852,1e-07
662,042,deglyc,5.1897914502247815,1e-07
663,042,deglyc,4.813623751193728,1e-07
664,042,G0,3.0020803703991734,1e-07
665,042,G0,5.881731281596558,1e-07
666,042,G2,5.53183747443782,1e-07
667,042,G2,4.525157049205298,1e-07
668,042,ST3,4.158839531345774,1e-07
669,042,ST3,3.874539435766653,1e-07
670,042,ST6,4.255844600952882,1e-07
671,042,ST6,4.005544822723542,1e-07
672,043,TRA,75.2795140604257,1.0
673,043,TRA,71.61097892698356,1.0
674,043,deglyc,42.43403437834585,1.0
675,043,deglyc,38.279017607249415,1.0
676,043,G0,79.11461231901684,1.0
677,043,G0,73.91796417183691,1.0
678,043,G2,75.24490695573475,1.0
679,043,G2,74.62076549661549,1.0
680,043,ST3,74.80526930081815,1.0
681,043,ST3,66.6129929553001,1.0
682,043,ST6,70.59825085458414,1.0
683,043,ST6,74.22465472030494,1.0
684,043,TRA,67.72131026017728,0.1
685,043,TRA,65.6273680508059,0.1
686,043,deglyc,28.765947256223946,0.1
687,043,deglyc,29.475403015510608,0.1
688,043,G0,67.93510166671335,0.1
689,043,G0,69.72749079377189,0.1
690,043,G2,74.4074190674629,0.1
691,043,G2,65.85669321327575,0.1
692,043,ST3,65.6588805400569,0.1
693,043,ST3,72.77105519206184,0.1
694,043,ST6,62.18211043266668,0.1
695,043,ST6,67.80308496752122,0.1
696,043,TRA,68.74706403416698,0.01
697,043,TRA,57.86773107953637,0.01
698,043,deglyc,22.779039502159304,0.01
699,043,deglyc,20.723486705238784,0.01
700,043,G0,58.984502954700396,0.01
701,043,G0,61.119807834494296,0.01
702,043,G2,68.75163516547042,0.01
703,043,G2,69.66620527231453,0.01
704,043,ST3,66.53498032947135,0.01
705,043,ST3,60.48154845657067,0.01
706,043,ST6,66.14394634058186,0.01
707,043,ST6,60.04959677464213,0.01
708,043,TRA,54.50157830443997,0.001
709,043,TRA,49.902292068389386,0.001
710,043,deglyc,20.174607102668315,0.001
711,043,deglyc,22.75723561036688,0.001
712,043,G0,41.3927266221777,0.001
713,043,G0,46.349774674577425,0.001
714,043,G2,55.6082977359854,0.001
715,043,G2,53.02645805183037,0.001
716,043,ST3,44.72491953241372,0.001
717,043,ST3,49.428674322367705,0.001
718,043,ST6,55.73695687855647,0.001
719,043,ST6,53.44932814988619,0.001
720,043,TRA,35.40442325722839,0.0001
721,043,TRA,33.57392788514486,0.0001
722,043,deglyc,20.63550254077029,0.0001
723,043,deglyc,23.97293404838502,0.0001
724,043,G0,27.231705690340444,0.0001
725,043,G0,28.828264316161285,0.0001
726,043,G2,28.950592644139558,0.0001
727,043,G2,35.132097098514855,0.0001
728,043,ST3,31.661940973143288,0.0001
729,043,ST3,30.05822225669673,0.0001
730,043,ST6,31.84636387236714,0.0001
731,043,ST6,36.393870921971896,0.0001
732,043,TRA,23.21554208914657,1e-05
733,043,TRA,18.795339023717602,1e-05
734,043,deglyc,18.96972970556757,1e-05
735,043,deglyc,21.51340246596353,1e-05
736,043,G0,26.44350916041566,1e-05
737,043,G0,24.56604844812621,1e-05
738,043,G2,30.664220774315254,1e-05
739,043,G2,26.814033737173904,1e-05
740,043,ST3,29.91034818165555,1e-05
741,043,ST3,30.541872220092287,1e-05
742,043,ST6,26.911483784164535,1e-05
743,043,ST6,27.583642348214426,1e-05
744,043,TRA,22.291890398429715,1e-06
745,043,TRA,22.787210905020288,1e-06
746,043,deglyc,21.954739125435385,1e-06
747,043,deglyc,20.42864873616816,1e-06
748,043,G0,19.029437579937913,1e-06
749,043,G0,18.49441295499064,1e-06
750,043,G2,22.417333568092605,1e-06
751,043,G2,19.432485958182443,1e-06
752,043,ST3,18.962711198654798,1e-06
753,043,ST3,22.01992831212089,1e-06
754,043,ST6,20.331441404114003,1e-06
755,043,ST6,22.997503171222352,1e-06
756,043,TRA,24.224629437499036,1e-07
757,043,TRA,22.022739760134947,1e-07
758,043,deglyc,26.804385818449436,1e-07
759,043,deglyc,25.77660941998917,1e-07
760,043,G0,22.713385111845568,1e-07
761,043,G0,21.638178169551157,1e-07
762,043,G2,24.766025329528503,1e-07
763,043,G2,20.84049553085954,1e-07
764,043,ST3,19.327430843182587,1e-07
765,043,ST3,24.122082376842656,1e-07
766,043,ST6,24.976762573114087,1e-07
767,043,ST6,22.414360310120927,1e-07
0,022,TRA,44.7285562212473,1.0
1,022,TRA,38.87582632459795,1.0
2,022,deglyc,15.664558058649538,1.0
3,022,deglyc,13.540001484072144,1.0
4,022,G0,39.2207165553064,1.0
5,022,G0,40.17451521670331,1.0
6,022,G2,38.16896271037279,1.0
7,022,G2,36.26781973666632,1.0
8,022,ST3,36.9378197053579,1.0
9,022,ST3,36.21597622123605,1.0
10,022,ST6,37.26307394369374,1.0
11,022,ST6,36.942909328891936,1.0
12,022,TRA,46.834391972352506,0.1
13,022,TRA,46.12998486412325,0.1
14,022,deglyc,12.207355009081983,0.1
15,022,deglyc,10.85638910048825,0.1
16,022,G0,47.07493689281589,0.1
17,022,G0,45.372642460021105,0.1
18,022,G2,44.47813711001597,0.1
19,022,G2,44.700410763660024,0.1
20,022,ST3,41.86589184507177,0.1
21,022,ST3,35.772922084259186,0.1
22,022,ST6,38.155138843297685,0.1
23,022,ST6,38.685952861148465,0.1
24,022,TRA,31.174198359541027,0.01
25,022,TRA,29.221292148378,0.01
26,022,deglyc,3.980628817903359,0.01
27,022,deglyc,4.499080027800801,0.01
28,022,G0,34.35214644971599,0.01
29,022,G0,32.39174227580725,0.01
30,022,G2,30.08230552774593,0.01
31,022,G2,32.12997185909152,0.01
32,022,ST3,28.07437679339322,0.01
33,022,ST3,28.33678943389873,0.01
34,022,ST6,29.732229339934978,0.01
35,022,ST6,25.32984948334836,0.01
36,022,TRA,22.0664856291322,0.001
37,022,TRA,18.34248676169385,0.001
38,022,deglyc,5.6494312800609245,0.001
39,022,deglyc,5.396186384154566,0.001
40,022,G0,19.33732352325791,0.001
41,022,G0,17.786882905557434,0.001
42,022,G2,18.04319442006001,0.001
43,022,G2,18.449513356261264,0.001
44,022,ST3,14.310397086701634,0.001
45,022,ST3,15.348375231344399,0.001
46,022,ST6,14.822217335969558,0.001
47,022,ST6,18.913455822000827,0.001
48,022,TRA,11.20490789560899,0.0001
49,022,TRA,10.18125134147839,0.0001
50,022,deglyc,5.116273145377443,0.0001
51,022,deglyc,5.411407087972431,0.0001
52,022,G0,10.22373444517257,0.0001
53,022,G0,8.288890778097208,0.0001
54,022,G2,10.680387670898096,0.0001
55,022,G2,9.23291158229465,0.0001
56,022,ST3,9.199644389983874,0.0001
57,022,ST3,6.885824464557287,0.0001
58,022,ST6,6.29123762438102,0.0001
59,022,ST6,7.131057618686106,0.0001
60,022,TRA,5.458610536521517,1e-05
61,022,TRA,5.010482831605366,1e-05
62,022,deglyc,5.704084524571497,1e-05
63,022,deglyc,3.3567084061287327,1e-05
64,022,G0,3.897717726642315,1e-05
65,022,G0,4.754749318513591,1e-05
66,022,G2,3.053739333298385,1e-05
67,022,G2,4.457271259085894,1e-05
68,022,ST3,4.1549122988558445,1e-05
69,022,ST3,3.0964472153189866,1e-05
70,022,ST6,3.588599361024794,1e-05
71,022,ST6,4.688889268871299,1e-05
72,022,TRA,7.333069111762486,1e-06
73,022,TRA,3.6697603924586786,1e-06
74,022,deglyc,3.3163285853460964,1e-06
75,022,deglyc,2.9602636606954054,1e-06
76,022,G0,3.5407215774964382,1e-06
77,022,G0,3.1851704318775718,1e-06
78,022,G2,2.8742859508381446,1e-06
79,022,G2,2.6020312307541915,1e-06
80,022,ST3,3.366405985354464,1e-06
81,022,ST3,3.60907024432414,1e-06
82,022,ST6,0.5538992871610285,1e-06
83,022,ST6,0.5021360497044812,1e-06
84,022,TRA,6.777561589194543,1e-07
85,022,TRA,4.521140414979858,1e-07
86,022,deglyc,4.3080505615297096,1e-07
87,022,deglyc,4.324764435658826,1e-07
88,022,G0,2.064554141084419,1e-07
89,022,G0,3.9282394122517754,1e-07
90,022,G2,3.17078461898642,1e-07
91,022,G2,2.144800003617863,1e-07
92,022,ST3,1.5377058551355618,1e-07
93,022,ST3,2.98383327378046,1e-07
94,022,ST6,1.432300875637351,1e-07
95,022,ST6,1.5970633889062955,1e-07
96,026,TRA,57.30137135383799,1.0
97,026,TRA,51.49306728784693,1.0
98,026,deglyc,14.042172320898574,1.0
99,026,deglyc,11.61137133216294,1.0
100,026,G0,59.566269882077826,1.0
101,026,G0,52.99007488623742,1.0
102,026,G2,52.305255603596585,1.0
103,026,G2,60.788967644257056,1.0
104,026,ST3,56.63182094179927,1.0
105,026,ST3,50.37107021590575,1.0
106,026,ST6,50.89274860034686,1.0
107,026,ST6,52.89584460068146,1.0
108,026,TRA,51.32552715668717,0.1
109,026,TRA,45.68058876722228,0.1
110,026,deglyc,2.931170923018213,0.1
111,026,deglyc,2.8537990119440515,0.1
112,026,G0,58.24884411090553,0.1
113,026,G0,48.7031026446749,0.1
114,026,G2,53.310127111876014,0.1
115,026,G2,51.39337810007781,0.1
116,026,ST3,48.4673422914454,0.1
117,026,ST3,46.95618971408494,0.1
118,026,ST6,49.07525527525968,0.1
119,026,ST6,50.114806868187415,0.1
120,026,TRA,47.463739175150785,0.01
121,026,TRA,44.3143700436212,0.01
122,026,deglyc,1.3510435106349987,0.01
123,026,deglyc,1.6758000255337473,0.01
124,026,G0,42.84187933840568,0.01
125,026,G0,44.46537291219402,0.01
126,026,G2,44.24136525431755,0.01
127,026,G2,46.7946704309544,0.01
128,026,ST3,38.912433080615614,0.01
129,026,ST3,43.172303478249276,0.01
130,026,ST6,46.820054326245575,0.01
131,026,ST6,39.60333743366465,0.01
132,026,TRA,29.68751450857131,0.001
133,026,TRA,31.32192588678597,0.001
134,026,deglyc,-0.02837291184614116,0.001
135,026,deglyc,-0.17834822235532286,0.001
136,026,G0,23.63107122580266,0.001
137,026,G0,21.305016937180707,0.001
138,026,G2,25.90971334314384,0.001
139,026,G2,27.560405094429523,0.001
140,026,ST3,18.404926969655552,0.001
141,026,ST3,22.546692412348037,0.001
142,026,ST6,29.50165494380797,0.001
143,026,ST6,29.756890733462647,0.001
144,026,TRA,11.637574062786102,0.0001
145,026,TRA,8.907304120874437,0.0001
146,026,deglyc,0.6108484817200769,0.0001
147,026,deglyc,0.462173674385207,0.0001
148,026,G0,3.8252748831547416,0.0001
149,026,G0,4.915915378559749,0.0001
150,026,G2,6.057853499173713,0.0001
151,026,G2,7.610124454675071,0.0001
152,026,ST3,4.026274873762219,0.0001
153,026,ST3,2.474036029450349,0.0001
154,026,ST6,9.347355861634066,0.0001
155,026,ST6,10.052662083169002,0.0001
156,026,TRA,2.3741541745442767,1e-05
157,026,TRA,0.5765376757508966,1e-05
158,026,deglyc,0.6085685872663467,1e-05
159,026,deglyc,0.6648434468461218,1e-05
160,026,G0,1.7518714334335967,1e-05
161,026,G0,1.5744571115059178,1e-05
162,026,G2,4.072322319489692,1e-05
163,026,G2,1.8086279608557112,1e-05
164,026,ST3,3.212593387701323,1e-05
165,026,ST3,1.6241652328351592,1e-05
166,026,ST6,2.2168093460473313,1e-05
167,026,ST6,0.5993526758829512,1e-05
168,026,TRA,0.4295326502694625,1e-06
169,026,TRA,-1.5326697502506759,1e-06
170,026,deglyc,0.3952860666792593,1e-06
171,026,deglyc,0.8778851335120369,1e-06
172,026,G0,1.4187981204571536,1e-06
173,026,G0,-0.13374578015486333,1e-06
174,026,G2,0.015892362864682704,1e-06
175,026,G2,-0.07355335545740672,1e-06
176,026,ST3,-1.0442425025256126,1e-06
177,026,ST3,0.6430720603724611,1e-06
178,026,ST6,0.5053632242481435,1e-06
179,026,ST6,-0.7388490348888336,1e-06
180,026,TRA,1.6263487937204206,1e-07
181,026,TRA,1.7195836324022378,1e-07
182,026,deglyc,1.0129126853140082,1e-07
183,026,deglyc,0.10694364066123296,1e-07
184,026,G0,0.08512408740334126,1e-07
185,026,G0,1.9208084013361335,1e-07
186,026,G2,0.6678297874686138,1e-07
187,026,G2,-0.5994864725058225,1e-07
188,026,ST3,-0.06732378469650667,1e-07
189,026,ST3,-2.2805232978587653,1e-07
190,026,ST6,-2.2210212637353264,1e-07
191,026,ST6,-0.06512416821649923,1e-07
192,027,TRA,54.01191715816188,1.0
193,027,TRA,49.504035988508605,1.0
194,027,deglyc,16.752115879863588,1.0
195,027,deglyc,9.127329991254252,1.0
196,027,G0,51.35283772334771,1.0
197,027,G0,49.4772070896904,1.0
198,027,G2,48.60665668704417,1.0
199,027,G2,48.77413259582496,1.0
200,027,ST3,53.17675328633274,1.0
201,027,ST3,48.73922773285022,1.0
202,027,ST6,50.45728875968418,1.0
203,027,ST6,56.18629424323173,1.0
204,027,TRA,50.65323123794711,0.1
205,027,TRA,46.51088779384382,0.1
206,027,deglyc,7.9408054840345725,0.1
207,027,deglyc,6.249509133639842,0.1
208,027,G0,48.717343957213366,0.1
209,027,G0,48.11558026618626,0.1
210,027,G2,51.78388227545564,0.1
211,027,G2,48.96787545760789,0.1
212,027,ST3,47.543182257946995,0.1
213,027,ST3,46.081802024294745,0.1
214,027,ST6,47.62188678338497,0.1
215,027,ST6,44.460748900907575,0.1
216,027,TRA,35.898252056835425,0.01
217,027,TRA,37.26928745885989,0.01
218,027,deglyc,2.170986678646281,0.01
219,027,deglyc,4.8862125282822655,0.01
220,027,G0,38.55420065067439,0.01
221,027,G0,36.030068489688475,0.01
222,027,G2,35.99646412988806,0.01
223,027,G2,33.64388599874805,0.01
224,027,ST3,34.62236210926738,0.01
225,027,ST3,24.886313678529163,0.01
226,027,ST6,39.29375345579953,0.01
227,027,ST6,34.19170289143333,0.01
228,027,TRA,30.50209510793789,0.001
229,027,TRA,22.982858699179467,0.001
230,027,deglyc,2.065212420468946,0.001
231,027,deglyc,3.809973901363151,0.001
232,027,G0,19.15550996837021,0.001
233,027,G0,21.54819497518221,0.001
234,027,G2,23.785461824866594,0.001
235,027,G2,21.019885630111588,0.001
236,027,ST3,19.261476893684485,0.001
237,027,ST3,18.68909494103998,0.001
238,027,ST6,28.32529362806161,0.001
239,027,ST6,28.87940431388678,0.001
240,027,TRA,11.890594180366035,0.0001
241,027,TRA,9.229202739908654,0.0001
242,027,deglyc,3.2188390140569694,0.0001
243,027,deglyc,2.5404740805034463,0.0001
244,027,G0,7.1991493959978925,0.0001
245,027,G0,5.5657655758468865,0.0001
246,027,G2,5.880085954161652,0.0001
247,027,G2,8.25737364561358,0.0001
248,027,ST3,6.846151089943419,0.0001
249,027,ST3,4.5797593913923444,0.0001
250,027,ST6,10.097360858937927,0.0001
251,027,ST6,8.475874234492663,0.0001
252,027,TRA,4.8827605754121794,1e-05
253,027,TRA,3.0020242626260765,1e-05
254,027,deglyc,2.326629614100301,1e-05
255,027,deglyc,3.5060254372533857,1e-05
256,027,G0,4.384041691455836,1e-05
257,027,G0,0.7628146859775876,1e-05
258,027,G2,1.1573327600415628,1e-05
259,027,G2,1.4715086380036309,1e-05
260,027,ST3,2.4254517997532328,1e-05
261,027,ST3,3.5041308770735218,1e-05
262,027,ST6,2.773890316900244,1e-05
263,027,ST6,4.213499164078842,1e-05
264,027,TRA,3.2818251122399817,1e-06
265,027,TRA,1.0221607078868922,1e-06
266,027,deglyc,3.232727103511037,1e-06
267,027,deglyc,2.7080302672579526,1e-06
268,027,G0,2.543974200157767,1e-06
269,027,G0,3.839628584856402,1e-06
270,027,G2,1.7121338364407468,1e-06
271,027,G2,2.1799938672979926,1e-06
272,027,ST3,3.4861646665543318,1e-06
273,027,ST3,1.310471022715428,1e-06
274,027,ST6,-0.1470879793876131,1e-06
275,027,ST6,2.1443825581545024,1e-06
276,027,TRA,6.493168839483688,1e-07
277,027,TRA,3.0548471693357646,1e-07
278,027,deglyc,3.2788066604279984,1e-07
279,027,deglyc,2.9004084034875866,1e-07
280,027,G0,1.9904415157434088,1e-07
281,027,G0,2.258794726304425,1e-07
282,027,G2,1.4696140778237692,1e-07
283,027,G2,2.4889516769680715,1e-07
284,027,ST3,3.233000048621692,1e-07
285,027,ST3,2.5891706993637795,1e-07
286,027,ST6,1.9232327961425677,1e-07
287,027,ST6,2.10796846927378,1e-07
288,028,TRA,52.2006855150251,1.0
289,028,TRA,57.7727796711338,1.0
290,028,deglyc,16.89640750983319,1.0
291,028,deglyc,16.500364154268475,1.0
292,028,G0,54.201886955179845,1.0
293,028,G0,51.361957301162654,1.0
294,028,G2,52.93163252136713,1.0
295,028,G2,50.003734263744356,1.0
296,028,ST3,48.3200643208533,1.0
297,028,ST3,43.77930129316311,1.0
298,028,ST6,50.15838175232421,1.0
299,028,ST6,47.64081632958883,1.0
300,028,TRA,52.105331337836994,0.1
301,028,TRA,48.623033393683656,0.1
302,028,deglyc,10.198414772260351,0.1
303,028,deglyc,8.741851217031474,0.1
304,028,G0,47.184564493731926,0.1
305,028,G0,54.846454861796,0.1
306,028,G2,54.739428267228575,0.1
307,028,G2,54.16272735959779,0.1
308,028,ST3,49.65004556711588,0.1
309,028,ST3,55.656588061418326,0.1
310,028,ST6,49.10065522614562,0.1
311,028,ST6,47.638215323240225,0.1
312,028,TRA,55.605643659293754,0.01
313,028,TRA,58.87673025458207,0.01
314,028,deglyc,6.024409695320742,0.01
315,028,deglyc,3.435509265135161,0.01
316,028,G0,56.9400080829216,0.01
317,028,G0,57.592282675015156,0.01
318,028,G2,59.50537101121161,0.01
319,028,G2,55.04414739988609,0.01
320,028,ST3,55.46891421444887,0.01
321,028,ST3,48.56715992397249,0.01
322,028,ST6,51.75973466095978,0.01
323,028,ST6,48.658757091990346,0.01
324,028,TRA,48.74015895734541,0.001
325,028,TRA,51.22709030530811,0.001
326,028,deglyc,8.194949493246629,0.001
327,028,deglyc,6.282760270355879,0.001
328,028,G0,41.5861070510526,0.001
329,028,G0,43.46947648137683,0.001
330,028,G2,49.28131277821169,0.001
331,028,G2,45.19718692065228,0.001
332,028,ST3,34.650379122096695,0.001
333,028,ST3,33.505486772049714,0.001
334,028,ST6,36.94681083841488,0.001
335,028,ST6,37.15349450956194,0.001
336,028,TRA,25.43808024752162,0.0001
337,028,TRA,21.599380211227952,0.0001
338,028,deglyc,4.696868899459357,0.0001
339,028,deglyc,7.898771936993242,0.0001
340,028,G0,17.415324331978212,0.0001
341,028,G0,18.162423266633308,0.0001
342,028,G2,19.39661683464968,0.0001
343,028,G2,21.94480027656297,0.0001
344,028,ST3,11.204506505740373,0.0001
345,028,ST3,14.884336432036363,0.0001
346,028,ST6,19.24758880423042,0.0001
347,028,ST6,18.69965952238192,0.0001
348,028,TRA,8.825645366003474,1e-05
349,028,TRA,6.82333608981136,1e-05
350,028,deglyc,6.215182272075918,1e-05
351,028,deglyc,5.245022959634282,1e-05
352,028,G0,6.156210072579047,1e-05
353,028,G0,7.3878347454362725,1e-05
354,028,G2,7.0181546764421725,1e-05
355,028,G2,8.41455791816308,1e-05
356,028,ST3,4.720920180386749,1e-05
357,028,ST3,4.823820487104803,1e-05
358,028,ST6,5.5404298473399285,1e-05
359,028,ST6,7.500272075432607,1e-05
360,028,TRA,6.1013962721210335,1e-06
361,028,TRA,5.968102724551475,1e-06
362,028,deglyc,5.553194045161873,1e-06
363,028,deglyc,3.194065231366071,1e-06
364,028,G0,4.058819564309497,1e-06
365,028,G0,3.5557817253668573,1e-06
366,028,G2,3.4527850850803365,1e-06
367,028,G2,5.124397276318207,1e-06
368,028,ST3,4.923172507384302,1e-06
369,028,ST3,5.650908394777429,1e-06
370,028,ST6,2.5281754949290955,1e-06
371,028,ST6,1.8097036857035984,1e-06
372,028,TRA,5.11079818756954,1e-07
373,028,TRA,2.018940196415051,1e-07
374,028,deglyc,2.7000024698856597,1e-07
375,028,deglyc,4.399840396684508,1e-07
376,028,G0,3.6766642981988484,1e-07
377,028,G0,4.070893371557425,1e-07
378,028,G2,2.024094042328062,1e-07
379,028,G2,2.6991996901484305,1e-07
380,028,ST3,5.76475861711129,1e-07
381,028,ST3,3.16895428118554,1e-07
382,028,ST6,4.7395767814799585,1e-07
383,028,ST6,4.491630231839309,1e-07
384,031,TRA,41.72551778021985,1.0
385,031,TRA,34.5110968376874,1.0
386,031,deglyc,7.106829726216521,1.0
387,031,deglyc,9.590100398577462,1.0
388,031,G0,42.375384033101724,1.0
389,031,G0,47.210767224355095,1.0
390,031,TRA,37.301735815838704,0.1
391,031,TRA,33.523180037458246,0.1
392,031,deglyc,2.12982013372116,0.1
393,031,deglyc,4.207654927591812,0.1
394,031,G0,40.677809945161854,0.1
395,031,G0,50.19299761459354,0.1
396,031,TRA,35.412265259511535,0.01
397,031,TRA,33.7943911438838,0.01
398,031,deglyc,-2.15825994387874,0.01
399,031,deglyc,-2.481009509434415,0.01
400,031,G0,37.384261572825864,0.01
401,031,G0,45.7133261249065,0.01
402,031,TRA,29.241522197756176,0.001
403,031,TRA,20.61722736951211,0.001
404,031,deglyc,-1.3009714624915492,0.001
405,031,deglyc,-2.911797172026413,0.001
406,031,G0,24.683162238225908,0.001
407,031,G0,30.895376901206546,0.001
408,031,TRA,11.467882481930571,0.0001
409,031,TRA,8.720834443510814,0.0001
410,031,deglyc,-2.0270054568417453,0.0001
411,031,deglyc,-3.235783018377421,0.0001
412,031,G0,4.345299541337149,0.0001
413,031,G0,6.5413195681227005,0.0001
414,031,TRA,0.17694603374762988,1e-05
415,031,TRA,-0.5897407264958591,1e-05
416,031,deglyc,-3.7314031725480588,1e-05
417,031,deglyc,-2.207968065207979,1e-05
418,031,G0,-0.8490225260261868,1e-05
419,031,G0,-0.031535864010824734,1e-05
420,031,TRA,-0.02241628619589992,1e-06
421,031,TRA,-1.7859467573465264,1e-06
422,031,deglyc,-1.4783376176349938,1e-06
423,031,deglyc,-2.03164552372293,1e-06
424,031,G0,-0.7734327859686744,1e-06
425,031,G0,-2.2050941137486966,1e-06
426,031,TRA,-1.7606752512185462,1e-07
427,031,TRA,-0.1619554601211008,1e-07
428,031,deglyc,-0.7270321171568199,1e-07
429,031,deglyc,-3.4088623297240623,1e-07
430,031,G0,-1.8743649176049628,1e-07
431,031,G0,-2.95487433272614,1e-07
432,033,TRA,56.38981496221411,1.0
433,033,TRA,56.25648930345507,1.0
434,033,deglyc,22.967926996067,1.0
435,033,deglyc,29.744576092293567,1.0
436,033,G0,63.54582565106575,1.0
437,033,G0,60.6525753669018,1.0
438,033,G2,60.57624706948604,1.0
439,033,G2,58.88645994499729,1.0
440,033,ST3,59.87211290636746,1.0
441,033,ST3,60.684172777359144,1.0
442,033,ST6,58.121555355770454,1.0
443,033,ST6,56.291859778677384,1.0
444,033,TRA,57.05800064869955,0.1
445,033,TRA,62.783217011887395,0.1
446,033,deglyc,17.47729892769232,0.1
447,033,deglyc,15.251142549571188,0.1
448,033,G0,61.71574473969882,0.1
449,033,G0,55.91265874199975,0.1
450,033,G2,59.83425381395971,0.1
451,033,G2,55.61749268821527,0.1
452,033,ST3,59.76006091064499,0.1
453,033,ST3,53.49320905874853,0.1
454,033,ST6,62.427938811379185,0.1
455,033,ST6,55.976030174456646,0.1
456,033,TRA,61.41762445648134,0.01
457,033,TRA,48.77976810958032,0.01
458,033,deglyc,4.397319668309609,0.01
459,033,deglyc,4.373782166414047,0.01
460,033,G0,52.546153747144366,0.01
461,033,G0,51.18985738109542,0.01
462,033,G2,44.956850722920564,0.01
463,033,G2,48.76186612144009,0.01
464,033,ST3,49.29581098026605,0.01
465,033,ST3,49.26442229254039,0.01
466,033,ST6,51.18654992857803,0.01
467,033,ST6,49.17825191554619,0.01
468,033,TRA,47.42282951974159,0.001
469,033,TRA,43.543589106717825,0.001
470,033,deglyc,1.708842439518108,0.001
471,033,deglyc,4.617249205120955,0.001
472,033,G0,47.42062990326158,0.001
473,033,G0,43.036730036225975,0.001
474,033,G2,40.615514237552865,0.001
475,033,G2,41.660091231635654,0.001
476,033,ST3,35.818937418797155,0.001
477,033,ST3,32.495846752131136,0.001
478,033,ST6,40.867041184821545,0.001
479,033,ST6,37.41987288196937,0.001
480,033,TRA,22.191687156950486,0.0001
481,033,TRA,19.074092047420415,0.0001
482,033,deglyc,3.236371723518056,0.0001
483,033,deglyc,6.971545284898638,0.0001
484,033,G0,21.1880198182769,0.0001
485,033,G0,13.946143808731206,0.0001
486,033,G2,16.60607419006683,0.0001
487,033,G2,17.018269473944596,0.0001
488,033,ST3,13.975300768787374,0.0001
489,033,ST3,12.308360755620177,0.0001
490,033,ST6,19.5804212832857,0.0001
491,033,ST6,21.604662501898908,0.0001
492,033,TRA,9.289732332095745,1e-05
493,033,TRA,5.259280327767477,1e-05
494,033,deglyc,4.0920867566202785,1e-05
495,033,deglyc,3.6561613037100154,1e-05
496,033,G0,9.165060638904032,1e-05
497,033,G0,5.549485202775877,1e-05
498,033,G2,5.6476169978547865,1e-05
499,033,G2,4.347242268301245,1e-05
500,033,ST3,4.906169632549785,1e-05
501,033,ST3,4.6907196066721815,1e-05
502,033,ST6,6.173582226092693,1e-05
503,033,ST6,6.629015226617629,1e-05
504,033,TRA,8.00250713463802,1e-06
505,033,TRA,6.170933052959838,1e-06
506,033,deglyc,4.412925706401347,1e-06
507,033,deglyc,3.418939891358749,1e-06
508,033,G0,3.2878459602692023,1e-06
509,033,G0,2.613093535533213,1e-06
510,033,G2,4.748439469778967,1e-06
511,033,G2,2.573789439598464,1e-06
512,033,ST3,2.9830947164222072,1e-06
513,033,ST3,2.9654175066084156,1e-06
514,033,ST6,4.3425058678515915,1e-06
515,033,ST6,3.64190393557682,1e-06
516,033,TRA,5.397069441865517,1e-07
517,033,TRA,2.4898829014632566,1e-07
518,033,deglyc,0.5383735270430138,1e-07
519,033,deglyc,3.0811622891221404,1e-07
520,033,G0,3.3538826214536863,1e-07
521,033,G0,1.7707367572584851,1e-07
522,033,G2,3.0469799279109173,1e-07
523,033,G2,0.5236666022569718,1e-07
524,033,ST3,3.3520201724633107,1e-07
525,033,ST3,3.336719190671721,1e-07
526,033,ST6,3.1230192246212765,1e-07
527,033,ST6,1.1475870140315996,1e-07
528,038,TRA,63.03586785078822,1.0
529,038,TRA,56.294637396568184,1.0
530,038,deglyc,44.15813305116161,1.0
531,038,deglyc,38.47570484796811,1.0
532,038,G0,56.85295464821646,1.0
533,038,G0,65.02947499462874,1.0
534,038,G2,61.4177529012393,1.0
535,038,G2,55.22677979010576,1.0
536,038,ST3,60.42771676250386,1.0
537,038,ST3,54.44397321273871,1.0
538,038,ST6,51.2649654533106,1.0
539,038,ST6,59.71797919681942,1.0
540,038,TRA,49.60903957813819,0.1
541,038,TRA,54.49303911027816,0.1
542,038,deglyc,28.53162407612429,0.1
543,038,deglyc,29.67857154229857,0.1
544,038,G0,54.83600266961728,0.1
545,038,G0,51.04811859069022,0.1
546,038,G2,53.202137181623925,0.1
547,038,G2,51.22246629402167,0.1
548,038,ST3,51.43600570412468,0.1
549,038,ST3,54.67042132101635,0.1
550,038,ST6,49.43305420414279,0.1
551,038,ST6,51.85518517171635,0.1
552,038,TRA,55.19018908968285,0.01
553,038,TRA,51.96245260020493,0.01
554,038,deglyc,10.133052446055146,0.01
555,038,deglyc,14.061792257676457,0.01
556,038,G0,54.60517138397435,0.01
557,038,G0,53.566807905057715,0.01
558,038,G2,61.65413942266384,0.01
559,038,G2,59.6832188341974,0.01
560,038,ST3,51.69432416797032,0.01
561,038,ST3,47.36485276711889,0.01
562,038,ST6,50.72972009131031,0.01
563,038,ST6,52.37988200796941,0.01
564,038,TRA,50.64048309571992,0.001
565,038,TRA,45.52741839335893,0.001
566,038,deglyc,11.30856281528004,0.001
567,038,deglyc,8.684741466524983,0.001
568,038,G0,46.931255375446575,0.001
569,038,G0,43.800013010383616,0.001
570,038,G2,51.360014574198544,0.001
571,038,G2,48.80746401051471,0.001
572,038,ST3,40.784194315939494,0.001
573,038,ST3,42.73734136102369,0.001
574,038,ST6,43.18473050858158,0.001
575,038,ST6,47.645440340875275,0.001
576,038,TRA,38.43571036145935,0.0001
577,038,TRA,29.566310823844415,0.0001
578,038,deglyc,8.6151404633072,0.0001
579,038,deglyc,10.21854848807007,0.0001
580,038,G0,36.870803652894004,0.0001
581,038,G0,31.80359372912356,0.0001
582,038,G2,31.99330663662559,0.0001
583,038,G2,28.8532658056426,0.0001
584,038,ST3,28.64070578681901,0.0001
585,038,ST3,28.506015402506677,0.0001
586,038,ST6,29.6510683085011,0.0001
587,038,ST6,34.63215602206158,0.0001
588,038,TRA,17.452846256896315,1e-05
589,038,TRA,14.87942342004452,1e-05
590,038,deglyc,7.769893677978451,1e-05
591,038,deglyc,8.85377476799599,1e-05
592,038,G0,15.304704013639126,1e-05
593,038,G0,14.358676260098605,1e-05
594,038,G2,15.423836526643958,1e-05
595,038,G2,18.16380404778135,1e-05
596,038,ST3,14.078955688458427,1e-05
597,038,ST3,10.691915587924706,1e-05
598,038,ST6,10.841698231296954,1e-05
599,038,ST6,15.873794569360989,1e-05
600,038,TRA,19.93268103198192,1e-06
601,038,TRA,8.215821766414594,1e-06
602,038,deglyc,7.724745345556671,1e-06
603,038,deglyc,9.774338348271595,1e-06
604,038,G0,11.38068454687272,1e-06
605,038,G0,10.479451902669599,1e-06
606,038,G2,10.279784526425919,1e-06
607,038,G2,8.129073388009594,1e-06
608,038,ST3,4.379658514090567,1e-06
609,038,ST3,9.74217899199819,1e-06
610,038,ST6,8.06769284930104,1e-06
611,038,ST6,6.5068160950165845,1e-06
612,038,TRA,11.013075649600667,1e-07
613,038,TRA,13.717608473136762,1e-07
614,038,deglyc,10.309712155029828,1e-07
615,038,deglyc,10.508014805720217,1e-07
616,038,G0,12.236383524380198,1e-07
617,038,G0,8.170143599366247,1e-07
618,038,G2,8.028292419797825,1e-07
619,038,G2,4.816306468764339,1e-07
620,038,ST3,9.228688960876823,1e-07
621,038,ST3,5.93602364625179,1e-07
622,038,ST6,5.184268589120765,1e-07
623,038,ST6,5.215063219840884,1e-07
624,044,TRA,60.88591132532488,1.0
625,044,TRA,57.21629275728643,1.0
626,044,deglyc,17.039944526849784,1.0
627,044,deglyc,16.025712606834265,1.0
628,044,G0,73.92684337828875,1.0
629,044,G0,59.1435742392371,1.0
630,044,G2,68.81710218403988,1.0
631,044,G2,62.2045733772925,1.0
632,044,ST3,63.94223828530959,1.0
633,044,ST3,55.40234771863781,1.0
634,044,TRA,62.98407250214217,0.1
635,044,TRA,57.1135048397316,0.1
636,044,deglyc,7.355113443346807,0.1
637,044,deglyc,6.81423256759118,0.1
638,044,G0,63.683004652563504,0.1
639,044,G0,60.98542390155181,0.1
640,044,G2,60.16697390385178,0.1
641,044,G2,68.6659708707091,0.1
642,044,ST3,61.44418041018889,0.1
643,044,ST3,59.807424915141524,0.1
644,044,TRA,59.08322125859222,0.01
645,044,TRA,50.97657486050833,0.01
646,044,deglyc,1.6137130406564322,0.01
647,044,deglyc,1.6147887655043178,0.01
648,044,G0,53.44045037441782,0.01
649,044,G0,51.453201246096135,0.01
650,044,G2,55.84994558892739,0.01
651,044,G2,51.47874569733477,0.01
652,044,ST3,54.27487568888871,0.01
653,044,ST3,50.169476168292725,0.01
654,044,TRA,38.01974201281661,0.001
655,044,TRA,37.66873460051046,0.001
656,044,deglyc,1.0512695011588271,0.001
657,044,deglyc,0.5471077705840685,0.001
658,044,G0,35.083848069011026,0.001
659,044,G0,32.00830256211703,0.001
660,044,G2,41.7782925201453,0.001
661,044,G2,33.847374606540924,0.001
662,044,ST3,28.884381548257604,0.001
663,044,ST3,24.10217448679831,0.001
664,044,TRA,15.608524032990935,0.0001
665,044,TRA,10.278162911356718,0.0001
666,044,deglyc,1.504454718419521,0.0001
667,044,deglyc,1.76497279874518,0.0001
668,044,G0,13.414575177927434,0.0001
669,044,G0,10.534233591938127,0.0001
670,044,G2,7.754351862265691,0.0001
671,044,G2,8.056630544522017,0.0001
672,044,ST3,3.4175912214002033,0.0001
673,044,ST3,3.8248253265018928,0.0001
674,044,TRA,1.7081359933493443,1e-05
675,044,TRA,0.6992184751942789,1e-05
676,044,deglyc,-1.2925101640611514,1e-05
677,044,deglyc,0.005713115796614694,1e-05
678,044,G0,1.0548498987868673,1e-05
679,044,G0,0.22695921137701666,1e-05
680,044,G2,-1.335796047492555,1e-05
681,044,G2,2.2053938181839303,1e-05
682,044,ST3,0.6547765889412651,1e-05
683,044,ST3,-1.432659450586645,1e-05
684,044,TRA,2.7492610345620503,1e-06
685,044,TRA,0.30229206191861435,1e-06
686,044,deglyc,1.1689891218261346,1e-06
687,044,deglyc,-1.5881578856879657,1e-06
688,044,G0,0.019488816087470804,1e-06
689,044,G0,-0.06165615975167025,1e-06
690,044,G2,-0.2364213085464931,1e-06
691,044,G2,1.7022757012675702,1e-06
692,044,ST3,1.107672805496558,1e-06
693,044,ST3,0.04292998441456753,1e-06
694,044,TRA,1.4135158297861856,1e-07
695,044,TRA,1.351091677419233,1e-07
696,044,deglyc,3.9100644790009014,1e-07
697,044,deglyc,0.4328240471921017,1e-07
698,044,G0,0.7391969061082992,1e-07
699,044,G0,1.0734422775011006,1e-07
700,044,G2,0.7125285632375421,1e-07
701,044,G2,0.3296668509581348,1e-07
702,044,ST3,-0.4200652012350703,1e-07
703,044,ST3,0.5573030732468807,1e-07

## Sheet: tSNE_clusters
# frequency of CD56-positive events in each of the tSNE clusters and in each donor (row)
donor,1,2,3,4,5,6,7,8,9,10,11,12,13,14,15,16,17,18
015,8.1,7.8,5.0,3.8,3.73,3.13,7.3,8.57,8.4,0.0,0.0,0.0,7.03,6.73,9.6,2.37,9.57,9.07
016,3.79,10.1,11.1,9.75,7.36,6.5,6.93,0.43,7.64,0.0,0.0,0.0,21.8,9.07,0.75,0.61,1.93,2.64
017,4.23,6.5,7.07,6.2,10.7,8.33,6.2,2.63,13.0,1.6,3.57,1.63,15.7,6.97,0.67,1.0,1.77,2.8
018,9.5,6.37,11.7,9.3,5.5,17.3,6.64,0.2,6.24,2.77,9.44,1.67,6.17,3.3,0.63,0.3,0.37,2.8
019,2.43,2.77,1.43,7.3,12.0,6.87,9.8,1.7,4.0,12.7,14.5,4.03,2.07,0.3,2.97,0.4,0.73,13.8
020,2.03,2.7,1.17,2.7,2.6,6.37,8.13,8.0,3.0,0.63,1.73,2.67,3.7,2.67,13.2,6.83,14.5,17.4
021,1.27,2.67,2.67,2.0,1.6,4.43,2.67,1.3,7.2,2.27,6.94,7.77,19.0,22.3,1.97,3.2,5.24,5.6
022,1.17,0.97,0.033,0.9,1.7,9.61,3.44,2.04,8.64,3.04,4.84,10.3,7.11,10.4,1.47,5.74,6.17,22.5
023,1.57,1.17,0.67,2.1,5.74,9.37,6.5,19.4,15.5,2.63,1.8,7.1,4.53,6.77,0.7,3.97,7.97,2.8
024,3.93,13.2,9.67,4.4,8.0,4.8,4.03,1.5,5.1,0.0,0.0,0.0,7.7,0.97,0.033,3.6,17.4,16.6
025,3.27,3.1,0.97,0.93,1.03,2.73,4.93,0.8,1.87,2.63,8.63,7.77,3.13,5.73,6.43,21.8,20.1,4.23
026,2.07,4.07,3.47,5.6,5.4,11.2,6.53,0.6,2.8,2.7,13.6,16.4,3.17,1.3,3.0,11.9,1.67,4.23
027,1.3,3.71,4.58,5.09,4.88,8.56,6.02,2.17,6.52,0.0,0.0,0.0,14.5,9.94,9.94,5.62,9.84,7.19
028,3.77,6.04,6.9,4.3,7.44,7.24,10.1,6.3,10.8,1.7,3.67,1.87,6.74,4.43,3.0,3.27,9.04,3.77
029,9.5,7.27,5.13,2.4,2.8,5.77,5.0,0.87,7.13,0.0,0.033,0.0,9.7,5.8,10.9,4.6,9.97,13.4
030,4.53,12.5,4.73,1.8,1.93,2.27,5.8,0.5,1.2,0.8,6.0,0.83,5.9,3.67,14.9,8.7,17.5,6.63
031,2.67,5.43,7.27,3.67,2.13,4.53,5.47,8.2,8.37,0.53,1.93,0.93,6.57,10.4,0.7,9.0,17.2,4.8
032,2.9,1.27,1.4,1.37,2.4,2.23,3.67,2.53,29.9,0.33,0.73,0.57,33.7,0.53,2.7,1.73,8.23,4.3
033,2.63,2.07,4.47,9.13,10.7,10.6,10.9,4.83,8.17,2.5,1.97,7.7,3.37,3.13,5.77,2.97,7.0,2.37
034,4.47,7.0,5.8,2.3,3.63,3.57,7.67,2.47,8.8,0.33,2.6,3.83,11.0,4.53,13.1,2.6,7.1,9.57
035,4.8,4.73,3.03,4.7,3.0,8.03,4.9,0.17,4.13,6.8,26.3,7.0,6.23,10.4,0.57,1.23,3.57,0.97
036,1.47,3.73,4.27,6.3,14.5,16.0,7.1,4.43,10.0,3.47,3.4,2.1,4.67,5.7,1.07,3.97,5.0,3.3
037,7.47,8.6,10.4,9.0,13.3,4.23,9.13,0.97,10.6,1.13,3.2,0.3,12.6,2.87,0.4,0.93,3.27,2.33
038,5.77,14.8,12.1,5.8,7.64,9.44,5.6,0.97,2.1,0.0,0.0,0.0,5.1,6.04,1.17,6.87,13.3,3.7
039,2.5,5.64,5.24,4.8,8.4,7.0,6.17,3.07,14.0,2.5,6.17,5.7,8.87,4.77,4.27,4.17,4.13,3.07
040,6.77,7.3,1.47,2.57,5.87,4.8,8.3,3.2,5.13,5.33,14.6,6.87,11.3,4.23,0.33,1.9,7.53,2.4
041,5.4,5.04,9.3,2.97,2.03,3.57,5.4,2.2,10.1,0.23,0.63,0.2,18.9,17.3,1.4,6.17,5.8,3.73
042,10.3,8.07,5.77,5.4,8.4,6.07,10.7,3.27,8.13,1.83,4.2,1.5,11.9,3.53,0.7,2.3,4.43,3.87
043,3.0,1.73,1.87,6.0,9.93,15.0,15.7,2.17,11.5,10.1,5.93,4.27,5.23,2.23,1.17,1.0,1.13,2.2
044,5.73,8.03,5.2,6.1,6.23,8.17,6.03,0.4,5.8,4.53,9.93,1.27,5.67,6.9,5.1,6.47,3.47,5.13
